# Supplementary material for: Intertester reliability of clinical shoulder instability and laxity tests in subjects with and without self-reported shoulder problems
Source: PubMed Central journal article supplement — BMJ Open. 2018 Mar 3;8(3):e018472. doi: 10.1136/bmjopen-2017-018472 (PMC5855406; doi:10.1136/bmjopen-2017-018472), 2018-03-03
Supplement: bmjopen-2017-018472.draft_revisions.pdf [file bmjopen-2017-018472.draft_revisions.pdf]

# BMJ Open

BMJ Open is committed to open peer review. As part of this commitment we make the peer review history of every article we publish publicly available.

When an article is published we post the peer reviewers' comments and the authors' responses online. We also post the versions of the paper that were used during peer review. These are the versions that the peer review comments apply to.

The versions of the paper that follow are the versions that were submitted during the peer review process. They are not the versions of record or the final published versions. They should not be cited or distributed as the published version of this manuscript.

BMJ Open is an open access journal and the full, final, typeset and author-corrected version of record of the manuscript is available on our site with no access controls, subscription charges or pay-per-view fees (<http://bmjopen.bmj.com>).

If you have any questions on BMJ Open's open peer review process please email [editorial.bmjopen@bmj.com](mailto:editorial.bmjopen@bmj.com)

# BMJ Open

## Inter-tester reliability of clinical shoulder instability and laxity tests in subjects with and without self-reported shoulder problems

|                                 |                                                                                                                                                                                                                                                                                                                                                                                                                                                                                                                                                                                                                                                                                                                                                                                                                                                                                                                                                                                                                                                                        |
|---------------------------------|------------------------------------------------------------------------------------------------------------------------------------------------------------------------------------------------------------------------------------------------------------------------------------------------------------------------------------------------------------------------------------------------------------------------------------------------------------------------------------------------------------------------------------------------------------------------------------------------------------------------------------------------------------------------------------------------------------------------------------------------------------------------------------------------------------------------------------------------------------------------------------------------------------------------------------------------------------------------------------------------------------------------------------------------------------------------|
| Journal:                        | <i>BMJ Open</i>                                                                                                                                                                                                                                                                                                                                                                                                                                                                                                                                                                                                                                                                                                                                                                                                                                                                                                                                                                                                                                                        |
| Manuscript ID                   | bmjopen-2017-018472                                                                                                                                                                                                                                                                                                                                                                                                                                                                                                                                                                                                                                                                                                                                                                                                                                                                                                                                                                                                                                                    |
| Article Type:                   | Research                                                                                                                                                                                                                                                                                                                                                                                                                                                                                                                                                                                                                                                                                                                                                                                                                                                                                                                                                                                                                                                               |
| Date Submitted by the Author:   | 30-Jun-2017                                                                                                                                                                                                                                                                                                                                                                                                                                                                                                                                                                                                                                                                                                                                                                                                                                                                                                                                                                                                                                                            |
| Complete List of Authors:       | Eshoj, Henrik; Syddansk Universitet Det Sundhedsvidenskabelige Fakultet, Department of Sports Science and Clinical Biomechanics; Odense Universitetshospital, Quality of Life Research Center, Department of Haematology<br>Ingwersen, Kim Gordon; Hospital Lillebaelt - Vejle Hospital, Vejle, Denmark, Research Unit at Department of Physical- and Occupational Therapy,; Syddansk Universitet Det Sundhedsvidenskabelige Fakultet, Department of Sports Science and Clinical Biomechanics<br>Larsen, Camilla; Research Unit for Musculoskeletal Function and Physiotherapy, Institute of Sports Science and Clinical Biomechanics<br>Kjær, Birgitte; Bispebjerg and Frederiksberg University Hospital, Copenhagen, Denmark , Research Unit at Department of Physical- and Occupational Therapy, ; Syddansk Universitet Det Sundhedsvidenskabelige Fakultet, Department of Sports Science and Clinical Biomechanics<br>Juul-Kristensen, Birgit; Research Unit for Musculoskeletal Function and Physiotherapy, Institute of Sports Science and Clinical Biomechanics |
| <b>Primary Subject Heading</b>: | Evidence based practice                                                                                                                                                                                                                                                                                                                                                                                                                                                                                                                                                                                                                                                                                                                                                                                                                                                                                                                                                                                                                                                |
| Secondary Subject Heading:      | Sports and exercise medicine                                                                                                                                                                                                                                                                                                                                                                                                                                                                                                                                                                                                                                                                                                                                                                                                                                                                                                                                                                                                                                           |
| Keywords:                       | Reliability, Shoulder < ORTHOPAEDIC & TRAUMA SURGERY, Instability, Laxity, Clinical test                                                                                                                                                                                                                                                                                                                                                                                                                                                                                                                                                                                                                                                                                                                                                                                                                                                                                                                                                                               |
|                                 |                                                                                                                                                                                                                                                                                                                                                                                                                                                                                                                                                                                                                                                                                                                                                                                                                                                                                                                                                                                                                                                                        |

SCHOLARONE™  
Manuscripts

1  
2  
3  
4 1 **Inter-tester reliability of clinical shoulder instability and laxity tests in subjects**  
5  
6  
7 2 **with and without self-reported shoulder problems**  
8  
9

3

10  
11 4 Henrik Eshoj<sup>1</sup>, PhD<sup>a,b</sup> Kim Gordon Ingwersen, PhD<sup>a,c</sup>, Camilla Marie Larsen, PhD<sup>a,d</sup> Birgitte Hougs  
12  
13 5 Kjær, Msc<sup>a,e</sup>, Birgit Juul-Kristensen, PhD<sup>a,f</sup>  
14  
15  
16  
17 6

7 **Affiliations**

8 <sup>a</sup> Department of Sports Science and Clinical Biomechanics, University of Southern Denmark,  
9 Odense, Denmark

10 <sup>b</sup> Quality of Life Research Center, Department of Haematology, Odense University Hospital,  
11 Odense, Denmark

12 <sup>c</sup> Research Unit at Department of Physical- and Occupational Therapy, Hospital Lillebaelt - Vejle  
13 Hospital, Vejle, Denmark

14 <sup>d</sup> Health Sciences Research Centre, University College Lillebaelt, Odense, Denmark

15 <sup>e</sup> Research Unit at Department of Physical- and Occupational Therapy, Bispebjerg and  
16 Frederiksberg University Hospital, Copenhagen, Denmark

17 <sup>f</sup> Institute of Occupational Therapy, Physiotherapy and Radiography, Department of Health  
18 Sciences, Bergen University College, Norway  
19

20 **Correspondence:**

21 Birgit Juul-Kristensen

22 Department of Sports Science and Clinical Biomechanics

23 University of Southern Denmark, Campusvej 55, 5230 Odense M, DK

24 Tel.: +45 2942 3335

25 Email: [bjjuul-kristensen@health.sdu.dk](mailto:bjjuul-kristensen@health.sdu.dk)

26 **Word counts: 2866**  
27  
28  
29  
30  
31  
32  
33  
34  
35  
36  
37  
38  
39  
40  
41  
42  
43  
44  
45  
46  
47  
48  
49  
50  
51  
52  
53  
54  
55  
56  
57  
58  
59  
60

1  
2  
3  
4 28 **Abstract**

5  
6  
7 29 **Objective:** Firstly, to investigate the inter-tester reliability of clinical shoulder instability and laxity  
8  
9 30 tests, and secondly, to describe the mutual dependency of each of the individual tests for  
10  
11 31 identifying self-reported shoulder problems.  
12  
13

14 32  
15  
16 33 **Method:** A standardized protocol for conducting reliability studies was used to test the inter-  
17  
18 34 tester reliability of the six clinical shoulder instability and laxity tests; apprehension, relocation,  
19  
20  
21 35 surprise, load-and-shift, sulcus sign and Gagey. Cohens kappa ( $k$ ) with 95% confidence intervals  
22  
23 36 (CI) besides Prevalence-Adjusted-Bias-Adjusted-Kappa (PABAK), accounting for insufficient  
24  
25 37 prevalence and bias, were computed to establish the inter-tester reliability and mutual  
26  
27  
28 38 dependency.  
29  
30

31 39  
32  
33 40 **Results:** Forty individuals (13 with instability and laxity related shoulder problems and 27 shoulder  
34  
35 41 healthy individuals) aged 18-60 were included. Fair (relocation), moderate (load-and-shift, sulcus  
36  
37 42 sign) and substantial (apprehension, surprise, Gagey) inter-tester reliability were observed across  
38  
39  
40 43 tests ( $k$  0.39-0.73; 95% CI: 0.00-1.00). PABAK improved reliability across tests, resulting in  
41  
42 44 substantial to almost perfect inter-tester reliability for the apprehension, surprise, load-and-shift  
43  
44 45 and Gagey tests ( $k$  0.65-0.90). Mutual dependencies between each test and self-reported shoulder  
45  
46 46 problem showed apprehension, relocation and surprise to be the most often used tests to  
47  
48 47 characterize such musculoskeletal shoulder conditions.  
49  
50

51 48  
52  
53 49 **Conclusions:** Four tests (apprehension, surprise, load-and-shift and Gagey) out of six, were  
54  
55 50 considered inter-tester reliable for clinical use, while relocation and sulcus sign tests need further  
56  
57  
58  
59  
60

1  
2  
3  
4 51 standardization before acceptable evidence. Furthermore, the validity of the tests for instability  
5  
6 52 and laxity needs to be studied.  
7  
8

9 53

## 10 11 54 Article summary section

12 55

### 13 56 Strengths and limitations of this study

14 57

- 15 58 • The strength of the study is the use of a three-phased standardized study protocol
- 16 59 • Presentation of raw findings increases transparency and interpretation of study findings
- 17 60 • No valid gold standard for including shoulder instability and laxity subjects was used
- 18 61 • A 50/50 prevalence of positive and negative tests for all six tests was not accomplished

19  
20  
21  
22  
23  
24  
25  
26  
27  
28 62

### 29 63 Keywords

30 64 Reliability, Shoulder instability, laxity, clinical tests

31  
32  
33  
34  
35 65

### 36 66 Acknowledgements

37 67 We would like to thank Physiotherapists Rasmus Fitzner, Pernille Madsen and Jacob Hansen from  
38  
39 68 Metropolitan University College, Copenhagen, Denmark for recruitment and testing of study  
40  
41  
42 69 participants. Furthermore, a special thanks to Bispebjerg Frederiksberg University Hospital,  
43  
44  
45 70 Copenhagen, Denmark for providing facilities for data collection.  
46  
47

48 71

49  
50 72  
51  
52  
53  
54  
55  
56  
57  
58  
59  
60

## 73 Introduction

74 Shoulder complaints, affecting shoulder-related quality of life (QoL), are frequent and may be  
75 caused by shoulder instability and/or laxity<sup>1</sup> due to traumatic or non-traumatic injuries to the  
76 shoulder joint.<sup>2</sup> The traumatic shoulder instability is mainly prompted by a high impact injury  
77 during sports participation, resulting in a shoulder dislocation, predominantly in anterior  
78 direction.<sup>3</sup> The non-traumatic shoulder instability is usually related to repetitive overhead  
79 activities and/or patients with generalised joint hypermobility or glenohumeral hyperlaxity, often  
80 referred to as multidirectional shoulder instability.<sup>2,4,5</sup>

81 Irrespectively of aetiology, shoulder instability and laxity is often accompanied by a variety of  
82 symptoms including shoulder discomfort, pain besides glenohumeral subluxations and/or  
83 repeated dislocations.<sup>6,7,8</sup> Clinically, shoulder instability and laxity, is diagnosed and verified by a  
84 group of shoulder pain and instability provoking/relieving tests, supplemented by shoulder laxity  
85 tests.<sup>9,10</sup> The former tests usually include the anterior shoulder instability and laxity tests;  
86 apprehension, relocation and surprise, and the laxity tests consisting of the load-and-shift, sulcus  
87 sign and Gagey tests.<sup>11,12,13</sup> An ongoing discussion is the use of pain as diagnostic criterion in  
88 diagnosing anterior shoulder instability with the shoulder-provoking tests apprehension,  
89 relocation and surprise. In one way, it may be a confounding factor, since pain has shown to be  
90 less predictive and reliable as a diagnostic criterion.<sup>14</sup> On the contrary though, others have  
91 suggested that unrecognized and underlying glenohumeral instability may lead to repetitive  
92 microtrauma and painful shoulder conditions,<sup>15,16</sup> justifying pain as diagnostic criterion when  
93 testing for anterior shoulder instability.

94 Nonetheless, symptoms may become chronic, and lead to reduced work and sports  
95 capability,<sup>17,18,19</sup> and with exercise-based management as the most often recommended first-

## Inter-tester reliability of clinical shoulder instability and laxity tests

1  
2  
3  
4 96 choice treatment.<sup>20,21</sup> Hence, early diagnosis using reliable and accurate clinical tests to guide  
5  
6 97 focused treatment is essential. Few studies though, have investigated the reliability of clinical  
7  
8 98 shoulder instability and laxity tests showing large variations in reliability and with limited  
9  
10 99 methodological quality, hampering interpretation and comparison with other studies.<sup>14,22,23</sup>  
11  
12  
13  
14  
15  
16  
17  
18  
19  
20  
21  
22  
23  
24  
25  
26  
27  
28  
29  
30  
31  
32  
33  
34  
35  
36  
37  
38  
39  
40  
41  
42  
43  
44  
45  
46  
47  
48  
49  
50  
51  
52  
53  
54  
55  
56  
57  
58  
59  
60

100

101 Therefore, the objective of this study was to investigate the inter-tester reliability of commonly  
102 used clinical shoulder instability and laxity tests in a group of sports-active individuals with and  
103 without self-reported shoulder problems.

104

105

## 106 **Materials and methods**

### 107 **Study design**

108 An inter-tester reliability study was conducted involving two physiotherapists as inter-tester  
109 examiners. A third physiotherapist (study coordinator), not involved in the actual inter-tester  
110 reliability study, managed all practical aspects during the study period. The Guidelines for  
111 Reporting Reliability and Agreement Studies (GRASS) were followed.<sup>24</sup> A standardized protocol for  
112 reliability studies, consisting of three phases: preparation and training of clinical tests, overall  
113 agreement, and study phase (the actual reliability study) were applied.<sup>25</sup> Two early career  
114 physiotherapists with six months clinical experience were involved in the inter-tester reliability  
115 study. A test-protocol describing each clinical test was developed and subsequently used by the  
116 two testers to practice all tests in order to reach uniformity and mutual agreement in performing  
117 and interpreting each test. In the overall agreement phase, the two testers examined 19  
118 individuals (eight shoulder cases and 11 shoulder healthy). The two testers were mutually blinded  
119 to the health status of the individuals (shoulder cases vs. shoulder healthy) and also to each  
120 other's test results. Before proceeding to the final study phase, the two testers needed an overall  
121 agreement of at least 80% based on findings from the six clinical shoulder tests.<sup>25</sup> In the actual  
122 inter-tester reliability study phase, the two testers examined a new group of shoulder cases and  
123 shoulder healthy individuals with the six clinical shoulder tests. The procedure was the same as in  
124 the agreement phase, meaning that testers were blinded to the health status of the individuals  
125 and each other's test results.

126

127

128



1  
2  
3  
4 129 **Study subjects**  
5

6 130 A sample size of at least 40 individuals was targeted based on recommendations for performing  
7  
8 131 clinical reliability studies.<sup>25</sup> Sixty-five (women and men (aged 18-60 years)) were recruited and  
9  
10 132 screened for eligibility from Metropolitan University College, Copenhagen, and Bispebjerg  
11  
12 133 Frederiksberg University Hospital, Copenhagen resulting in an included number of 13 individuals  
13  
14 134 with instability and/or laxity related shoulder problems (hereinafter referred to as cases) vs. 27  
15  
16 135 shoulder healthy individuals, respectively.  
17  
18 136 Cases answering yes to at least one of two questions (*'Do you have a sense of shoulder instability?'*  
19  
20 137 and *'Have you ever had a shoulder injury?'*) were eligible for a clinical shoulder examination  
21  
22 138 performed by the study coordinator. Cases were then included if they present with at least one  
23  
24 139 positive clinical shoulder test out of the following; apprehension, relocation, surprise, load-and-  
25  
26 140 shift, sulcus sign or Gagey. The shoulder healthy individuals were included if they present with no  
27  
28 141 self-reported shoulder pathology or complaints. In general, any individuals with prior shoulder  
29  
30 142 surgery were excluded. In the actual study phase, individuals completed a short questionnaire  
31  
32 143 with basic demographic details (age, gender, weight, height), in addition to the following: pain  
33  
34 144 level during rest and activity (numeric pain rating scale, NPRS),<sup>26</sup> shoulder injury ever (yes/no),  
35  
36 145 subjective shoulder instability (yes/no) and sports-related activity (hours/week). Further, all  
37  
38 146 individuals filled in the patient-reported Western Ontario Shoulder Instability (WOSI)  
39  
40 147 questionnaire designed to measure shoulder function and quality of life in patients with shoulder  
41  
42 148 instability and laxity symptoms.<sup>27</sup> The study was exempted for notification to the Danish Health  
43  
44 149 Research Study Board due to the non-invasive/-non-treating study design. However, oral and  
45  
46 150 written consent was provided from all individuals and, ethical guidelines were followed according  
47  
48 151 to the Helsinki declaration.<sup>28</sup>  
49  
50  
51  
52  
53  
54  
55  
56  
57  
58  
59  
60

## Inter-tester reliability of clinical shoulder instability and laxity tests

152 **Clinical tests**

153 The clinical shoulder tests consisted of three shoulder joint-provoking tests for anterior shoulder  
154 instability (apprehension, relocation and surprise) besides three shoulder laxity tests (load and  
155 shift, sulcus sign and Gagey) (Table 1).<sup>11,13,14,22,23,29</sup>

156 The apprehension and surprise tests were positive if glenohumeral apprehension and/or pain  
157 were evoked during testing whereas relieve of symptoms with the relocation test was regarded as  
158 a positive test. The load and shift test was rated on a four-point scale ranging from 0-3 (best to  
159 worst; 0= little glenohumeral movement; 3=humeral head moves beyond the glenoid rim and  
160 remains dislocated).<sup>12</sup> Also, to enhance mutual agreement between testers when performing the  
161 load-and-shift test, only the direction (anterior vs. posterior) with most glenohumeral head  
162 translation was rated. Sulcus sign was objectively measured in centimeter (continuous scale) by  
163 use of a small ruler according to previously used grading scales as follows; I (<1 cm translation), II  
164 (1 to 2.0 cm) or III (>2.0 cm).<sup>29</sup> Finally, Gagey test was rated as positive with passive abduction  
165 above 105 degrees.<sup>13</sup>

167 **Statistics**

168 Demographics and descriptive data were tested for normality by visual inspection of histograms  
169 and Shapiro-Wilk's test. Group differences (shoulder cases vs. shoulder healthy) were tested by  
170 Fisher's Exact test for categorical variables, whereas student's t-test and Mann-Whitney U-test  
171 was used for parametric, respectively non-parametric distributed data.

172 Apprehension, relocation, surprise and Gagey test were dichotomous variables whereas the load  
173 and shift and sulcus sign test were dichotomized to also allow for nominal statistics. Thus, load-  
174 and-shift was rated positive when scored 2 or 3, while for sulcus sign a positive rating was equal to

## Inter-tester reliability of clinical shoulder instability and laxity tests

1  
2  
3  
4 175 measurements exceeding one centimeter.<sup>29</sup> For transparency, data from each test is presented by  
5  
6 176 2 x 2 contingency tables besides the use of McNemar's test for significant between-tester  
7  
8  
9 177 differences. Furthermore, observed and expected agreements are presented along with  
10  
11 178 prevalence and bias<sup>30</sup> indexes. Reliability was evaluated with the use of Cohen's kappa (*k*)  
12  
13 179 coefficients including 95% confidence intervals (CI).<sup>25</sup> Also, since kappa is sensitive to imbalances  
14  
15 180 in prevalence and bias (e.g. the number of positive and negative tests not close to 50%) a  
16  
17  
18 181 Prevalence-Adjusted-Bias-Adjusted Kappa (PABAK) was calculated.<sup>30,31</sup> By definition, PABAK  
19  
20 182 reflects the ideal situation, thereby accounting for variation of prevalence and bias between  
21  
22  
23 183 testers (as presented in the "real" world).<sup>32</sup> The relationship between the individual tests and the  
24  
25 184 classification (mutual dependency) by self-reported shoulder problems was tested by Cohen's  
26  
27  
28 185 kappa (*k*) coefficients and the characterization of the groups was tested with Fischer's exact tests.  
29  
30 186 The classification system proposed by Landis and Koch was used to interpret reliability as follows:  
31  
32 187 0.00-0.20 (Slight); 0.21-0.40 (Fair); 0.41-0.60 (Moderate); 0.61-0.80 (Substantial) and 0.81-1.00  
33  
34 188 (Almost perfect).<sup>33</sup>  
35  
36  
37 189 Statistical Package for the Social Sciences (SPSS inc., Chicago, IL, USA), version 22, was used for all  
38  
39  
40 190 statistical analyses, with p-value of <0.05 interpreted as significant.  
41  
42  
43  
44  
45  
46  
47  
48  
49  
50  
51  
52  
53  
54  
55  
56  
57  
58  
59  
60

## Inter-tester reliability of clinical shoulder instability and laxity tests

**Table 1.** Performance and evaluation of the clinical shoulder instability and laxity tests**Verbal introduction:**

1. I am going to perform six clinical shoulder tests on you
2. I will ask if you experience any symptoms (apprehension and/or pain) during the three first tests.
3. I will guide you through each test

| Clinical tests                                                                                           | Description                                                                                                                                                                                                                                         | Placing of hands, etc.                                                                                                                                        | Evaluation                                                                                                                                         |
|----------------------------------------------------------------------------------------------------------|-----------------------------------------------------------------------------------------------------------------------------------------------------------------------------------------------------------------------------------------------------|---------------------------------------------------------------------------------------------------------------------------------------------------------------|----------------------------------------------------------------------------------------------------------------------------------------------------|
| <b>Apprehension</b><br> | <p>Individuals placed supine with the shoulder being tested close to the edge of the examination table.</p> <p>Shoulder positioned in 90° of abduction, elbow flexed to 90°.</p> <p>Examiner moves the shoulder into maximal external rotation.</p> | <p>One hand around the wrist of the individual with the other hand gently placed in front of the shoulder.</p> <p>Elbow supported at the examiners thigh.</p> | <p>Subjective or objective presence of apprehension and/or pain?</p> <p>Rated as either positive or negative.</p> <p>(Nominal, dichotome data)</p> |
| <b>Relocation</b><br>  | <p>From the end position of the apprehension test the humeral head is gently forced posteriorly</p>                                                                                                                                                 | <p>Examiners fifth finger placed close to the lateral part of the acromion with the wrist positioned anteriorly of the humeral head.</p>                      | <p>Diminish of apprehension symptoms and/or pain?</p> <p>Rated as either positive or negative.</p> <p>(Nominal, dichotome data)</p>                |

Inter-tester reliability of clinical shoulder instability and laxity tests

1  
2  
3  
4  
5  
6  
7  
8  
9  
10  
11  
12  
13  
14  
15  
16  
17  
18  
19  
20  
21  
22  
23  
24  
25  
26  
27  
28  
29  
30  
31  
32  
33  
34  
35  
36  
37  
38  
39  
40  
41  
42  
43  
44  
45  
46  
47  
48  
49

**Surprise**

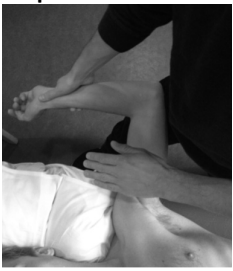

From end position of the relocation test the posteriorly directed force at the humeral head is quickly removed.

Removal of examiners wrist from the anterior part of the shoulder.

Subjective or objective reproduction of apprehension symptoms and/or pain?  
Rated as either positive or negative.

(Nominal, dichotome data)

**Load-and-shift**

Individual placed supine with scapula resting at the examination table.  
Humeral head is loaded gently into the glenoid through axial pressure at the elbow.

Examiners one hand placed at the olecranon with the individual's hand positioned between the examiners torso and elbow.

Humeral head movement evaluated by the use of a four-level laxity scale.

0 = little to almost no movement

**Anterior test**

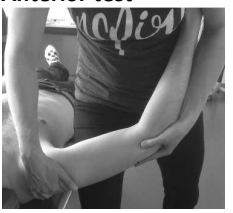

*Anterior load-and-shift:*  
Shoulder positioned in the scapular plane in 90° of abduction with elbow flexed.  
Humeral head gently shifted in anterior direction.

*Anterior load-and-shift:* Examiners hand placed on top of the shoulder with the fingers on the backside of the glenohumeral head to move it anteriorly.

1 = humeral head moves up onto the glenoid

2 = humeral head moves beyond the glenoid, but relocates spontaneously once pressure is released

**Posterior test**

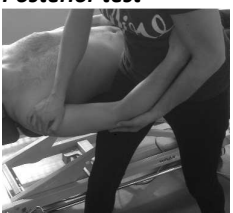

*Posterior load-and-shift:* Shoulder positioned in the scapular plane in 20° of abduction with elbow flexed.  
Humeral head gently shifted in posterior direction.

*Posterior load-and-shift:* Examiners wrist placed at the anterior part of the humeral head to move it posteriorly.

3 = humeral head moves beyond the glenoid and remains dislocated

Rated as positive when scored 2 or 3.

Inter-tester reliability of clinical shoulder instability and laxity tests

(Nominal, dichotome data)

**Sulcus sign**

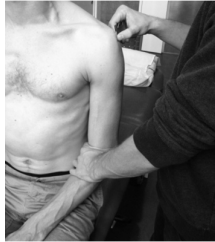

Individual sitting upright.

Examiner pulls the distal part of the humerus in a caudal direction.

Distance from the top of the humeral head and the acromion is measured with a ruler.

One hand placed above the epicondyles of humerus.

Other hand is used to measure the subacromial distance with a ruler

Rated as positive with measurements exceeding 1 centimeter.

(Nominal, dichotome data)

**Gagey**

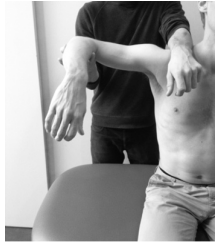

Individual sitting upright.

The shoulder girdle is gently depressed with the arm passively moved into end range in horizontal abduction.

A mirror in front of the individual is used to evaluate shoulder abduction angle.

Forearm placed on top of the shoulder girdle with the other hand placed around the elbow joint.

Rated as positive with abduction exceeding 105 degrees.

(Nominal, dichotome data)

191 **Results**

192 Characteristics of the participating individuals are presented in Table 2. Demographics  
 193 showed no difference between the shoulder cases (n=13) and shoulder healthy (n=27)  
 194 individuals. Further, both groups (92 and 74%; p=0.18) were relatively active with a  
 195 weekly participation in sports-related activity for more than four hours per week.  
 196 However, as expected due to the design, shoulder cases had significantly higher pain  
 197 during activity (4.23 vs. 1.44; p=0.02), higher frequency of shoulder injury ever (62% vs.  
 198 <1%; p<0.001), higher subjective shoulder instability (69 vs. 11%; p<0.001) and worse  
 199 total WOSI score (506 vs. 136; p=0.001) (Table 2).

201 **Table 2.** Study phase. Participant characteristics.

|                                                | Shoulder cases (n=13) | Shoulder healthy (n=27) | P-value |
|------------------------------------------------|-----------------------|-------------------------|---------|
| Sex (women/men)                                | 8/5                   | 21/6                    | 0.28    |
| Age (years) mean (SD)                          | 28 (9)                | 29 (7)                  | 0.72    |
| Weight (kg)* mean (SD)                         | 71.0 (12.8)           | 74.9 (23.4)             | 0.59    |
| Height (cm) mean (SD)                          | 174.0 (8.6)           | 173.4 (7.9)             | 0.82    |
| Pain, rest (NRS 0-10) mean (SD)                | 1.08 (1.44)           | 0.41 (1.15)             | 0.12    |
| Pain, activity (NRS 0-10) mean (SD)            | 4.23 (2.92)           | 1.44 (2.12)             | <0.05   |
| Shoulder injury ever, n (%)                    | 8 (62)                | 1 (<1)                  | <0.001  |
| Subjective shoulder instability, n (%)         | 9 (69)                | 3 (11)                  | <0.001  |
| Sports-related activity (>4 hours/week), n (%) | 12 (92)               | 20 (74)                 | 0.18    |
| WOSI domains, mean (SD)                        |                       |                         |         |
| - Physical symptoms (0-1000)                   | 225 (165)             | 60 (78)                 | <0.05   |
| - Sports, recreation, work (0-400)             | 103 (93)              | 24 (47)                 | <0.05   |
| - Lifestyle (0-400)                            | 58 (57)               | 13 (21)                 | <0.05   |
| - Emotions (0-300)                             | 121 (94)              | 39 (49)                 | <0.05   |
| WOSI total score (0-2100) mean (SD)            | 506 (362)             | 136 (174)               | <0.001  |

SD Standard deviation; kg kilo; \* significance level p < 0.05; cm centimeter NRS Numeric Rating Scale

202

203

204

## Inter-tester reliability of clinical shoulder instability and laxity tests

205 Prevalence of positive tests was especially low for the load-and-shift test (table 3), and  
 206 significant between-tester differences were found for relocation and sulcus sign tests  
 207 ( $p=0.021$ ) (not shown in tables).

208

209 **Table 3.** Contingency tables with findings from tester A and B.

| Apprehension |     | A   |    |
|--------------|-----|-----|----|
|              |     | Yes | No |
| B            | Yes | 14  | 4  |
|              | No  | 3   | 19 |

| Relocation |     | A   |    |
|------------|-----|-----|----|
|            |     | Yes | No |
| B          | Yes | 6   | 2  |
|            | No  | 8   | 24 |

| Surprise |     | A   |    |
|----------|-----|-----|----|
|          |     | Yes | No |
| B        | Yes | 14  | 4  |
|          | No  | 3   | 19 |

  

| Load-and-shift |     | A   |    |
|----------------|-----|-----|----|
|                |     | Yes | No |
| B              | Yes | 1   | 0  |
|                | No  | 2   | 37 |

| Sulcus |     | A   |    |
|--------|-----|-----|----|
|        |     | Yes | No |
| B      | Yes | 7   | 1  |
|        | No  | 9   | 23 |

| Gagey |     | A   |    |
|-------|-----|-----|----|
|       |     | Yes | No |
| B     | Yes | 8   | 3  |
|       | No  | 1   | 28 |

210

211

212 Reliability varied between  $k$ : 0.39-0.73 (95% CI: 0.00-1.00), indicating fair (relocation;  $k$   
 213 0.39), moderate (load-and-shift, sulcus sign;  $k$  0.43 and 0.48) and substantial  
 214 (apprehension, surprise, Gagey;  $k$  0.65-0.73) reliability (Table 4). The prevalence index  
 215 of all six tests ranged from 0.05-0.44, (lowest for load-and-shift, relocation and sulcus;  
 216 0.05, 0.28 and 0.30), whereas the bias index ranged from and 0.03-0.20 (highest for  
 217 relocation and sulcus). PABAK improved reliability for relocation, load-and-shift, sulcus  
 218 sign and Gagey test, now corresponding to moderate (relocation and sulcus sign;  $k$   
 219 0.50), substantial (Gagey;  $k$ : 0.80) and almost perfect (load and shift;  $k$ : 0.90) reliability  
 220 (Table 4).

221

222



## Inter-tester reliability of clinical shoulder instability and laxity tests

**Table 4.** Study phase. Reliability of six clinical shoulder instability and laxity tests.

|                       | Observed agreement | Expected agreement | Prevalence index | Bias index | Kappa (95% CI)    | PABAK |
|-----------------------|--------------------|--------------------|------------------|------------|-------------------|-------|
| <b>Apprehension</b>   | 0.83               | 0.51               | 0.44             | 0.03       | 0.65 (0.38; 0.85) | 0.65  |
| <b>Relocation*</b>    | 0.75               | 0.59               | 0.28             | 0.15       | 0.39 (0.07; 0.68) | 0.50  |
| <b>Surprise</b>       | 0.83               | 0.51               | 0.44             | 0.03       | 0.65 (0.38; 0.85) | 0.65  |
| <b>Load and Shift</b> | 0.95               | 0.90               | 0.05             | 0.05       | 0.48 (0.00; 1.00) | 0.90  |
| <b>Sulcus sign*</b>   | 0.75               | 0.56               | 0.30             | 0.20       | 0.43 (0.17; 0.72) | 0.50  |
| <b>Gagey</b>          | 0.90               | 0.62               | 0.40             | 0.05       | 0.73 (0.46; 0.94) | 0.80  |

\*Significant inter-tester differences, CI Confidence intervals, PABAK prevalence-and-bias-adjusted kappa

The *k* values for mutual dependency indicate that apprehension, relocation and surprise tests for both examiners were the most frequently used tests for characterizing self-reported shoulder problems (Table 5). This was further confirmed by the significant group difference in the presence of positive tests.

**Table 5.** Kappa statistics for mutual dependency of the individual tests and self-reported shoulder problems.

|                       | Observed agreement | Expected agreement | Prevalence index | Kappa | p-value (cases/controls) |
|-----------------------|--------------------|--------------------|------------------|-------|--------------------------|
| <b>Apprehension</b>   |                    |                    |                  |       |                          |
| Examiner A            | 0.75               | 0.53               | 0.38             | 0.47  | 0.003                    |
| Examiner B            | 0.68               | 0.52               | 0.40             | 0.33  | 0.04                     |
| <b>Relocation*</b>    |                    |                    |                  |       |                          |
| Examiner A            | 0.83               | 0.55               | 0.35             | 0.61  | <0.001                   |
| Examiner B            | 0.73               | 0.63               | 0.25             | 0.27  | 0.08                     |
| <b>Surprise</b>       |                    |                    |                  |       |                          |
| Examiner A            | 0.75               | 0.53               | 0.38             | 0.47  | 0.003                    |
| Examiner B            | 0.68               | 0.52               | 0.40             | 0.33  | 0.04                     |
| <b>Load and Shift</b> |                    |                    |                  |       |                          |
| Examiner A            | 0.75               | 0.65               | 0.20             | 0.29  | 0.03                     |
| Examiner B            | 0.70               | 0.67               | 0.18             | 0.10  | 0.33                     |
| <b>Sulcus sign*</b>   |                    |                    |                  |       |                          |
| Examiner A            | 0.63               | 0.61               | 0.28             | 0.05  | 0.52                     |
| Examiner B            | 0.63               | 0.54               | 0.38             | 0.19  | 0.19                     |
| <b>Gagey</b>          |                    |                    |                  |       |                          |
| Examiner A            | 0.70               | 0.60               | 0.28             | 0.26  | 0.10                     |
| Examiner B            | 0.70               | 0.58               | 0.30             | 0.29  | 0.08                     |

## 233 Discussion

234 The inter-tester reliability across the selected six clinical shoulder instability and laxity  
235 tests ranged from fair to substantial. Use of PABAK calculations improved inter-tester  
236 reliability to substantial and almost perfect across most tests, except for the relocation  
237 and sulcus sign tests. The tests most often used to characterize self-reported shoulder  
238 problems (mutual dependency) were apprehension, relocation and surprise tests.  
239  
240 The inter-tester reliability for the apprehension, relocation and surprise was higher  
241 than, or equivocal, to previously reported results of these tests using the same  
242 diagnostic procedures (apprehension and/or pain).<sup>23</sup> Specifically for the apprehension  
243 and surprise test, the present  $k$  values were somewhat higher than previously reported  
244 (0.65 vs. 0.44-0.45). The reason for this may be that the current study included both  
245 shoulder cases and shoulder healthy individuals as opposed to only including  
246 symptomatic subjects.<sup>23</sup> This may have increased subject variation, known to affect  
247 reliability positively. Also, PABAK calculations did not affect the overall reliability of the  
248 apprehension and surprise tests, probably due to an optimal prevalence index of  
249 positive and negative tests (close to 0.50). For the relocation test, the existing inter-  
250 tester reliability was almost similar to previously reported ( $k$  0.39 vs. 0.44),<sup>23</sup> however,  
251 fairly lower. Apparently, the primary reason for the current poor reliability in  
252 relocation was presence of systematic bias between testers, as indicated by the actual  
253 raw data (contingency tables) and the statistical significant inter-examiner difference.  
254 Likewise, systematic bias between testers was also found for the sulcus sign test in the  
255 present study. Hypothetically, this may be explained by inter-tester variability in the

## Inter-tester reliability of clinical shoulder instability and laxity tests

1  
2  
3  
4 256 force produced to relocate, respectively inferiorly translate the glenohumeral head  
5  
6 257 during the relocation and sulcus sign tests in the current study. This is, however, only  
7  
8  
9 258 speculative and further studies are needed to standardize these tests.  
10  
11 259 Reliability for the present sulcus sign test was slightly lower than previously reported ( $k$   
12  
13 260 0.39 vs.  $>0.50$ ).<sup>22,23</sup> The discrepancy in reliability observed may be due to the use of  
14  
15 261 different test positions with participants in the current study sitting upright<sup>29</sup> as  
16  
17 262 opposed to a previous lying test position.<sup>22</sup> Although, using PABAK it applies for both  
18  
19 263 the relocation and sulcus sign test that overall reliability was not affected much, due to  
20  
21 264 the presence of systematic bias.  
22  
23 265 For the load-and-shift test, reliability was relatively low (including wide CI). This may be  
24  
25 266 due to the current poor prevalence index. However, the present dichotomous rating of  
26  
27 267 the load-and-shift test (meaning that only individuals that could either subluxate or  
28  
29 268 dislocate the shoulder during testing was deemed positive) may have influenced the  
30  
31 269 prevalence of positive tests largely. Therefore, using PABAK, reliability of the load-and-  
32  
33 270 shift test improved considerably (from moderate to almost perfect). Nevertheless,  
34  
35 271 different statistics (kappa vs. Intra-class-Correlation Coefficients), different scoring  
36  
37 272 systems (dichotomous rating (positive yes/no) vs. four point grading scale (0-3)<sup>23</sup> and  
38  
39 273 inclusion of shoulder asymptomatic athletes only<sup>22</sup> make comparison across studies  
40  
41 274 difficult.  
42  
43 275 Finally, reliability of the Gagey test was substantial and PABAK did not affect reliability  
44  
45 276 much due to a nearly optimal prevalence and low bias between testers. Unfortunately,  
46  
47 277 there is no other study to compare with.  
48  
49  
50  
51  
52  
53  
54  
55  
56  
57  
58  
59  
60

## Inter-tester reliability of clinical shoulder instability and laxity tests

1  
2  
3  
4 278 Although the current study was designed to investigate reliability, and not diagnostic  
5  
6 279 accuracy, the mutual dependency between the individual tests and self-reported  
7  
8  
9 280 shoulder problems was analysed. It revealed that the tests most often used to  
10  
11 281 characterize those with and without self-reported shoulder problems (mutual  
12  
13 282 dependency) proved to be the apprehension, relocation and surprise tests. This may  
14  
15 283 indicate a relationship between these tests, which may come as no surprise, since  
16  
17 284 these tests are a continuum of the apprehension test and, thus, closely related.<sup>9</sup>  
18  
19 285 Nevertheless, for clinicians it is of interest to specify the clinical characteristics of  
20  
21 286 patients with self-reported shoulder problems. Thus, the current prevalence of  
22  
23 287 positive tests may mirror these characteristics of the included patients and should be  
24  
25 288 taken into consideration in the management of such musculoskeletal conditions. It  
26  
27 289 could be suggested to develop and test the clinimetric properties of a more  
28  
29 290 comprehensive test battery for evaluating self-reported shoulder problems. No prior  
30  
31 291 studies were found addressing mutual dependency of the current tests for shoulder  
32  
33 292 instability and laxity, which hampers comparison.  
34  
35 293 The present study has several limitations. First, despite the use of a standardized test  
36  
37 294 protocol, including training and an overall agreement phase, two of the tests  
38  
39 295 (relocation and sulcus sign tests) failed to reach recommendable reliability values.  
40  
41 296 Further standardization in both performance and interpretation are therefore needed.  
42  
43 297 Secondly, no valid gold standard for classifying shoulder instability/laxity was used. To  
44  
45 298 compensate for this, self-reported confirmation of shoulder-related problems was  
46  
47 299 applied, but this was not reflected in the current WOSI scores, which were relatively  
48  
49  
50  
51  
52  
53  
54  
55  
56  
57  
58  
59  
60

## Inter-tester reliability of clinical shoulder instability and laxity tests

1  
2  
3  
4 300 low. Lack of a more objective gold standard may have decreased diagnostic accuracy,  
5  
6 301 however, not reliability, which was the primary objective of the present study-  
7  
8 302 Thirdly, although the recommended prevalence of 0.50 in reliability studies<sup>25</sup> in all six  
9  
10 303 tests was not accomplished, use of PABAK calculations was able to represent a valid  
11  
12 304 alternative for the original kappa values. Nevertheless, future studies should use  
13  
14 305 inclusion criteria of more established shoulder instability and laxity conditions, and, if  
15  
16 306 possible, verified by objective criteria as surrogate for a gold standard of shoulder  
17  
18 307 instability and laxity. This may optimize prevalence as well as diagnostic accuracy in  
19  
20 308 studies where this is a further aim.  
21  
22 309 The strengths of the study are the use of standardized procedures (including blinding  
23  
24 310 to patient status and the use of a three-phased protocol for conducting reliability  
25  
26 311 studies). Also, presentation of raw data, using contingency tables, along with kappa  
27  
28 312 and PABAK values, increases data transparency and improves interpretation of the  
29  
30 313 reliability study.  
31  
32  
33  
34  
35  
36  
37

### 314 **Conclusions**

315 This study showed acceptable inter-tester reliability for four of six clinical shoulder  
316 instability and laxity tests in relatively sports active individuals with and without self-  
317 reported shoulder disability. However, relocation and sulcus sign tests need further  
318 standardisation before being recommended for use in clinical practice. Based on the  
319 frequency and mutual dependency of the current tests, especially apprehension and  
320 surprise tests seem important in the characterisation of self-reported shoulder  
321  
322  
323  
324  
325  
326  
327  
328  
329  
330

## Inter-tester reliability of clinical shoulder instability and laxity tests

1  
2  
3  
4 321 problems. Future research on the validity of tests for shoulder instability and laxity is

5  
6 322 needed.

7  
8 323

9  
10 324

11  
12 325

13  
14 326

15  
16 327

17  
18  
19  
20  
21  
22  
23  
24  
25  
26  
27  
28  
29  
30  
31  
32  
33  
34  
35  
36  
37  
38  
39  
40  
41  
42  
43  
44  
45  
46  
47  
48  
49  
50  
51  
52  
53  
54  
55  
56  
57  
58  
59  
60

For peer review only

## Inter-tester reliability of clinical shoulder instability and laxity tests

1  
2  
3  
4 328 **Author statement:** HE, KGI, CML and BJK conceived and designed the study. HE and  
5  
6 329 BHK recruited study participants and collected data. HE performed the statistical  
7  
8 330 analysis. HE, KGI, CML, BJK interpreted the results. HE drafted the manuscript with  
9  
10 331 KGI, CML, BHK and BJK contributing to the manuscript. All authors have read and  
11  
12 332 approved the final manuscript. HE is the guarantor.  
13  
14  
15  
16

17 334 **Funding:** This work was supported by Region of Southern Denmark's Research fund  
18  
19 335 and The Danish Rheumatism Association.  
20  
21  
22

23 336  
24 337 **Competing interest:** None declared  
25  
26  
27

28 339 **Data sharing statement:** No additional data are available  
29  
30  
31 340  
32  
33  
34  
35  
36  
37  
38  
39  
40  
41  
42  
43  
44  
45  
46  
47  
48  
49  
50  
51  
52  
53  
54  
55  
56  
57  
58  
59  
60

## References

1. Luime, J. J., B. W. Koes, I. J. Hendriksen, A. Burdorf, A. P. Verhagen, H. S. Miedema, and J. A. Verhaar. 2004. 'Prevalence and incidence of shoulder pain in the general population; a systematic review', *Scandinavian Journal of Rheumatology*, 33: 73-81.
2. Farrar, N. G., J. J. Malal, J. Fischer, and M. Waseem. 2013. 'An overview of shoulder instability and its management', *Open Orthopaedics Journal*, 7: 338-46.
3. Goss, T. P. 1988. 'Anterior glenohumeral instability', *Orthopedics*, 11: 87-95.
4. Cameron, K. L., M. L. Duffey, T. M. DeBerardino, P. D. Stoneman, C. J. Jones, and B. D. Owens. 2010. 'Association of generalized joint hypermobility with a history of glenohumeral joint instability', *J Athl Train*, 45: 253-8.
5. Chahal, J., J. Leiter, M. D. McKee, and D. B. Whelan. 2010. 'Generalized ligamentous laxity as a predisposing factor for primary traumatic anterior shoulder dislocation', *J Shoulder Elbow Surg*, 19: 1238-42.
6. Dodson, C. C., and F. A. Cordasco. 2008. 'Anterior glenohumeral joint dislocations', *Orthop Clin North Am*, 39: 507-18, vii.
7. Jaggi, A., and S. Lambert. 2010. 'Rehabilitation for shoulder instability', *Br J Sports Med*, 44: 333-40.
8. Wilk, K. E., L. C. Macrina, and M. M. Reinold. 2006. 'Non-operative rehabilitation for traumatic and atraumatic glenohumeral instability', *N Am J Sports Phys Ther*, 1: 16-31.
9. Hegedus, E. J., A. P. Goode, C. E. Cook, L. Michener, C. A. Myer, D. M. Myer, and A. A. Wright. 2012. 'Which physical examination tests provide clinicians with the most value when examining the shoulder? Update of a systematic review with meta-analysis of individual tests', *Br J Sports Med*, 46: 964-78.
10. Ann Ganestam, Mikkel L. Attrup, Per Hølmich and Kristoffer W Barfoed. 2015. 'Evaluation of Clinical Practice of Shoulder Examination among Ten Experienced Shoulder Surgeons', *Journal of Orthopaedic Research and Physiotherapy*, 1.
11. Luime, J. J., A. P. Verhagen, H. S. Miedema, J. I. Kuiper, A. Burdorf, J. A. Verhaar, and B. W. Koes. 2004. 'Does this patient have an instability of the shoulder or a labrum lesion?', *JAMA*, 292: 1989-99.
12. Tzannes, A., and G. A. Murrell. 2002. 'Clinical examination of the unstable shoulder', *Sports Medicine*, 32: 447-57.
13. Gagey, O. J., and N. Gagey. 2001. 'The hyperabduction test', *J Bone Joint Surg Br*, 83: 69-74.



## Inter-tester reliability of clinical shoulder instability and laxity tests

- 1  
2  
3  
4 388 14. Lo, I. K., B. Nonweiler, M. Woolfrey, R. Litchfield, and A. Kirkley. 2004. 'An  
5 389 evaluation of the apprehension, relocation, and surprise tests for anterior shoulder  
6 390 instability', *Am J Sports Med*, 32: 301-7.  
7 391  
8 392 15. Silliman, J. F., and R. J. Hawkins. 1993. 'Classification and physical diagnosis of  
9 393 instability of the shoulder', *Clin Orthop Relat Res*: 7-19.  
10 394  
11 395 16. Cavallo, R. J., and K. P. Speer. 1998. 'Shoulder instability and impingement in  
12 396 throwing athletes', *Med Sci Sports Exerc*, 30: S18-25.  
13 397  
14 398 17. Matsen, F. A., 3rd, and J. D. Zuckerman. 1983. 'Anterior glenohumeral  
15 399 instability', *Clin Sports Med*, 2: 319-38.  
16 400  
17 401 18. Robinson, C. M., J. Howes, H. Murdoch, E. Will, and C. Graham. 2006. 'Functional  
18 402 outcome and risk of recurrent instability after primary traumatic anterior shoulder  
19 403 dislocation in young patients', *J Bone Joint Surg Am*, 88: 2326-36.  
20 404  
21 405 19. van Kampen, D. A., T. van den Berg, H. J. van der Woude, R. M. Castelein, C. B.  
22 406 Terwee, and W. J. Willems. 2013. 'Diagnostic value of patient characteristics,  
23 407 history, and six clinical tests for traumatic anterior shoulder instability', *J Shoulder  
24 408 Elbow Surg*, 22: 1310-9.  
25 409  
26 410 20. Warby, S. A., T. Pizzari, J. J. Ford, A. J. Hahne, and L. Watson. 2014. 'The effect of  
27 411 exercise-based management for multidirectional instability of the glenohumeral  
28 412 joint: a systematic review', *J Shoulder Elbow Surg*, 23: 128-42.  
29 413  
30 414 21. Gibson, K., A. Growse, L. Korda, E. Wray, and J. C. MacDermid. 2004. 'The  
31 415 effectiveness of rehabilitation for nonoperative management of shoulder  
32 416 instability: a systematic review', *J Hand Ther*, 17: 229-42.  
33 417  
34 418 22. Levy, A. S., S. Lintner, K. Kenter, and K. P. Speer. 1999. 'Intra- and interobserver  
35 419 reproducibility of the shoulder laxity examination', *Am J Sports Med*, 27: 460-3.  
36 420  
37 421 23. Tzannes, A., A. Paxinos, M. Callanan, and G. A. Murrell. 2004. 'An assessment of  
38 422 the interexaminer reliability of tests for shoulder instability', *J Shoulder Elbow  
39 423 Surg*, 13: 18-23.  
40 424  
41 425 24. Kottner, J., L. Audige, S. Brorson, A. Donner, B. J. Gajewski, A. Hrobjartsson, C.  
42 426 Roberts, M. Shoukri, and D. L. Streiner. 2011. 'Guidelines for Reporting Reliability  
43 427 and Agreement Studies (GRRAS) were proposed', *Int J Nurs Stud*, 48: 661-71.  
44 428  
45 429 25. Patijn J, Remvig L. . 2007. "Reproducibility And Validity 2007-Protocol Formats  
46 430 For Diagnostics Procedures In Manual/Musculoskeletal Medicine." In.  
47 431  
48 432 26. Downie, W. W., P. A. Leatham, V. M. Rhind, V. Wright, J. A. Branco, and J. A.  
49 433 Anderson. 1978. 'Studies with pain rating scales', *Annals of the Rheumatic Diseases*,  
50 434 37: 378-81.  
51  
52  
53  
54  
55  
56  
57  
58  
59  
60

## Inter-tester reliability of clinical shoulder instability and laxity tests

- 1  
2  
3  
4 435  
5 436 27. Kirkley, A., S. Griffin, H. McLintock, and L. Ng. 1998. 'The development and  
6 437 evaluation of a disease-specific quality of life measurement tool for shoulder  
7 438 instability. The Western Ontario Shoulder Instability Index (WOSI)', *Am J Sports*  
8 439 *Med*, 26: 764-72.  
9 440  
10 441 28. 'World Medical Association Declaration of Helsinki: ethical principles for  
11 442 medical research involving human subjects'. 2000. *JAMA*, 284: 3043-5.  
12 443  
13 444 29. Bahk, M., E. Keyurapan, A. Tasaki, E. L. Sauers, and E. G. McFarland. 2007.  
14 445 'Laxity testing of the shoulder: a review', *Am J Sports Med*, 35: 131-44.  
15 446  
16 447 30. Sim, J., and C. C. Wright. 2005. 'The kappa statistic in reliability studies: use,  
17 448 interpretation, and sample size requirements', *Phys Ther*, 85: 257-68.  
18 449  
19 450 31. Byrt, T., J. Bishop, and J. B. Carlin. 1993. 'Bias, prevalence and kappa', *J Clin*  
20 451 *Epidemiol*, 46: 423-9.  
21 452  
22 453 32. Hoehler, F. K. 2000. 'Bias and prevalence effects on kappa viewed in terms of  
23 454 sensitivity and specificity', *J Clin Epidemiol*, 53: 499-503.  
24 455  
25 456 33. Landis, J. R., and G. G. Koch. 1977. 'The measurement of observer agreement for  
26 457 categorical data', *Biometrics*, 33: 159-74.  
27  
28  
29  
30  
31  
32  
33  
34  
35  
36  
37  
38  
39  
40  
41  
42  
43  
44  
45  
46  
47  
48  
49  
50  
51  
52  
53  
54  
55  
56  
57  
58  
59  
60

# BMJ Open

## Inter-tester reliability of clinical shoulder instability and laxity tests in subjects with and without self-reported shoulder problems

|                                 |                                                                                                                                                                                                                                                                                                                                                                                                                                                                                                                                                                                                                                                                                                                                                                                                                                                                                                                                                                                                                                                                        |
|---------------------------------|------------------------------------------------------------------------------------------------------------------------------------------------------------------------------------------------------------------------------------------------------------------------------------------------------------------------------------------------------------------------------------------------------------------------------------------------------------------------------------------------------------------------------------------------------------------------------------------------------------------------------------------------------------------------------------------------------------------------------------------------------------------------------------------------------------------------------------------------------------------------------------------------------------------------------------------------------------------------------------------------------------------------------------------------------------------------|
| Journal:                        | <i>BMJ Open</i>                                                                                                                                                                                                                                                                                                                                                                                                                                                                                                                                                                                                                                                                                                                                                                                                                                                                                                                                                                                                                                                        |
| Manuscript ID                   | bmjopen-2017-018472.R1                                                                                                                                                                                                                                                                                                                                                                                                                                                                                                                                                                                                                                                                                                                                                                                                                                                                                                                                                                                                                                                 |
| Article Type:                   | Research                                                                                                                                                                                                                                                                                                                                                                                                                                                                                                                                                                                                                                                                                                                                                                                                                                                                                                                                                                                                                                                               |
| Date Submitted by the Author:   | 06-Oct-2017                                                                                                                                                                                                                                                                                                                                                                                                                                                                                                                                                                                                                                                                                                                                                                                                                                                                                                                                                                                                                                                            |
| Complete List of Authors:       | Eshoj, Henrik; Syddansk Universitet Det Sundhedsvidenskabelige Fakultet, Department of Sports Science and Clinical Biomechanics; Odense Universitetshospital, Quality of Life Research Center, Department of Haematology<br>Ingwersen, Kim Gordon; Hospital Lillebaelt - Vejle Hospital, Vejle, Denmark, Research Unit at Department of Physical- and Occupational Therapy,; Syddansk Universitet Det Sundhedsvidenskabelige Fakultet, Department of Sports Science and Clinical Biomechanics<br>Larsen, Camilla; Research Unit for Musculoskeletal Function and Physiotherapy, Institute of Sports Science and Clinical Biomechanics<br>Kjær, Birgitte; Bispebjerg and Frederiksberg University Hospital, Copenhagen, Denmark , Research Unit at Department of Physical- and Occupational Therapy, ; Syddansk Universitet Det Sundhedsvidenskabelige Fakultet, Department of Sports Science and Clinical Biomechanics<br>Juul-Kristensen, Birgit; Research Unit for Musculoskeletal Function and Physiotherapy, Institute of Sports Science and Clinical Biomechanics |
| <b>Primary Subject Heading</b>: | Evidence based practice                                                                                                                                                                                                                                                                                                                                                                                                                                                                                                                                                                                                                                                                                                                                                                                                                                                                                                                                                                                                                                                |
| Secondary Subject Heading:      | Sports and exercise medicine                                                                                                                                                                                                                                                                                                                                                                                                                                                                                                                                                                                                                                                                                                                                                                                                                                                                                                                                                                                                                                           |
| Keywords:                       | Reliability, Shoulder < ORTHOPAEDIC & TRAUMA SURGERY, Instability, Laxity, Clinical test                                                                                                                                                                                                                                                                                                                                                                                                                                                                                                                                                                                                                                                                                                                                                                                                                                                                                                                                                                               |
|                                 |                                                                                                                                                                                                                                                                                                                                                                                                                                                                                                                                                                                                                                                                                                                                                                                                                                                                                                                                                                                                                                                                        |

SCHOLARONE™  
Manuscripts

1  
2  
3  
4 1 **Inter-tester reliability of clinical shoulder instability and laxity tests in subjects**  
5  
6  
7 2 **with and without self-reported shoulder problems**  
8  
9

10 3

11 4 Henrik Eshoj, PhD <sup>a</sup> Kim Gordon Ingwersen, PhD <sup>b,c</sup>, Camilla Marie Larsen, PhD <sup>b,d</sup> Birgitte Hougs

12 5 Kjær, Msc <sup>b,e</sup>, Birgit Juul-Kristensen, PhD <sup>b,f</sup>  
13  
14  
15  
16  
17 6

18  
19 7 **Affiliations**

20 8 <sup>a</sup> Quality of Life Research Center, Department of Haematology, Odense University Hospital,  
21 9 Odense, Denmark

22 10 <sup>b</sup> Department of Sports Science and Clinical Biomechanics, University of Southern Denmark,  
23 11 Odense, Denmark

24 12 <sup>c</sup> Research Unit at Department of Physical- and Occupational Therapy, Hospital Lillebaelt - Vejle  
25 13 Hospital, Vejle, Denmark

26 14 <sup>d</sup> Health Sciences Research Centre, University College Lillebaelt, Odense, Denmark

27 15 <sup>e</sup> Research Unit at Department of Physical- and Occupational Therapy, Bispebjerg and  
28 16 Frederiksberg University Hospital, Copenhagen, Denmark

29 17 <sup>f</sup> Institute of Occupational Therapy, Physiotherapy and Radiography, Department of Health  
30 18 Sciences, Bergen University College, Norway  
31  
32  
33  
34  
35  
36  
37  
38 19

39 20 **Correspondence:**

40 21 Birgit Juul-Kristensen

41 22 Department of Sports Science and Clinical Biomechanics

42 23 University of Southern Denmark, Campusvej 55, 5230 Odense M, DK

43 24 Tel.: +45 2942 3335

44 25 Email: [bjjuul-kristensen@health.sdu.dk](mailto:bjjuul-kristensen@health.sdu.dk)  
45  
46  
47  
48  
49  
50  
51  
52 26

53 27 **Word counts: 3001**  
54  
55  
56  
57 28  
58  
59  
60

1  
2  
3  
4 29 **Abstract**

5  
6  
7 30 **Objective:** Firstly, to investigate the inter-tester reliability of clinical shoulder instability and laxity  
8  
9 31 tests, and secondly, to describe the mutual dependency of each test evaluated by each tester for  
10  
11 32 identifying self-reported shoulder instability and laxity.  
12  
13

14 33  
15  
16 34 **Method:** A standardized protocol for conducting reliability studies was used to test the inter-  
17  
18 35 tester reliability of the six clinical shoulder instability and laxity tests; apprehension, relocation,  
19  
20  
21 36 surprise, load-and-shift, sulcus sign and Gagey. Cohens kappa ( $k$ ) with 95% confidence intervals  
22  
23 37 (CI) besides Prevalence-Adjusted-Bias-Adjusted-Kappa (PABAK), accounting for insufficient  
24  
25 38 prevalence and bias, were computed to establish the inter-tester reliability and mutual  
26  
27 39 dependency.  
28  
29

30 40  
31  
32 41 **Results:** Forty individuals (13 with self-reported shoulder instability and laxity related shoulder  
33  
34 42 problems and 27 normal shoulders individuals) aged 18-60 were included. Fair (relocation),  
35  
36 43 moderate (load-and-shift, sulcus sign) and substantial (apprehension, surprise, Gagey) inter-tester  
37  
38 44 reliability were observed across tests ( $k$  0.39-0.73; 95% CI: 0.00-1.00). PABAK improved reliability  
39  
40 45 across tests, resulting in substantial to almost perfect inter-tester reliability for the apprehension,  
41  
42 46 surprise, load-and-shift and Gagey tests ( $k$  0.65-0.90). Mutual dependencies between each test  
43  
44 47 and self-reported shoulder problem showed apprehension, relocation and surprise to be the most  
45  
46 48 often used tests to characterize self-reported shoulder instability conditions.  
47  
48  
49  
50

51 50 **Conclusions:** Four tests (apprehension, surprise, load-and-shift and Gagey) out of six, were  
52  
53  
54 51 considered inter-tester reliable for clinical use, while relocation and sulcus sign tests need further  
55  
56  
57  
58  
59  
60

1  
2  
3  
4 52 standardization before acceptable evidence. Furthermore, the validity of the tests for instability  
5  
6 53 and laxity needs to be studied.  
7  
8

9 54

## 10 11 55 Article summary section

12 56

### 13 57 Strengths and limitations of this study

14 58

- 15 59
- 16 59 • The strength of the study is the use of a three-phased standardized study protocol
  - 17  
18 60 • Presentation of raw findings increases transparency and interpretation of study findings
  - 19 61 • No valid gold standard for including shoulder instability and laxity subjects was used
  - 20  
21 61 • No valid gold standard for including shoulder instability and laxity subjects was used
  - 22  
23 62 • A 50/50 prevalence of positive and negative tests for all six tests was not accomplished
  - 24  
25

26 63

### 27 28 64 Keywords

29  
30 65 Reliability, Shoulder instability, laxity, clinical tests

31  
32 66

### 33 34 67 Acknowledgements

35  
36 68 We would like to thank Physiotherapists Rasmus Fitzner, Pernille Madsen and Jacob Hansen from  
37  
38 69 Metropolitan University College, Copenhagen, Denmark for recruitment and testing of study  
39  
40 69 Metropolitan University College, Copenhagen, Denmark for recruitment and testing of study  
41  
42 70 participants. Furthermore, a special thanks to Bispebjerg Frederiksberg University Hospital,  
43  
44 71 Copenhagen, Denmark for providing facilities for data collection.  
45  
46

47  
48 72

49  
50 73

51  
52

53

54

55

56

57

58

59

60

## 74 Introduction

75 Shoulder complaints, affecting shoulder-related quality of life (QoL), are frequent and may be  
76 caused by shoulder instability and/or laxity<sup>1</sup> due to traumatic or non-traumatic injuries to the  
77 shoulder joint.<sup>2</sup> The traumatic shoulder instability is mainly prompted by a high impact injury  
78 during sports participation, resulting in a shoulder dislocation, predominantly in anterior  
79 direction.<sup>3</sup> The non-traumatic shoulder instability is usually related to repetitive overhead  
80 activities and/or patients with generalised joint hypermobility or glenohumeral hyperlaxity, often  
81 referred to as multidirectional shoulder instability.<sup>2,4,5</sup>

82 Irrespectively of aetiology, shoulder instability and laxity is often accompanied by a variety of  
83 symptoms including shoulder discomfort, pain besides glenohumeral subluxations and/or  
84 repeated dislocations.<sup>6,7,8</sup> Clinically, shoulder instability and laxity, are diagnosed and verified by a  
85 group of shoulder pain and instability provoking/relief tests, supplemented by shoulder laxity  
86 tests.<sup>9,10</sup> The former tests usually include the anterior shoulder instability and laxity tests;  
87 apprehension, relocation and surprise, and the laxity tests consisting of the load-and-shift, sulcus  
88 sign and Gagey tests.<sup>11,12,13</sup> An ongoing discussion is the use of pain as diagnostic criterion in  
89 diagnosing anterior shoulder instability with the clinical tests apprehension, relocation and  
90 surprise.<sup>14,15,16</sup> In one way, it may be a confounding factor, since pain has shown to be less  
91 predictive and reliable as a diagnostic criterion.<sup>14</sup> On the contrary though, others have suggested  
92 that unrecognized and underlying glenohumeral instability may lead to repetitive microtrauma  
93 and painful shoulder conditions,<sup>15,16</sup> justifying pain as diagnostic criterion when testing for anterior  
94 shoulder instability.

95 Nonetheless, symptoms may become chronic, and lead to reduced work and sports  
96 capability,<sup>17,18,19</sup> and with exercise-based management as the most often recommended first-

## Inter-tester reliability of clinical shoulder instability and laxity tests

1  
2  
3  
4 97 choice treatment.<sup>20,21</sup> Hence, early diagnosis using reliable and accurate clinical tests to guide  
5  
6 98 focused treatment is essential. Few studies though, have investigated the reliability of clinical  
7  
8  
9 99 shoulder instability and laxity tests showing large variations in reliability and with limited  
10  
11 100 methodological quality, hampering interpretation and comparison with other studies.<sup>14,22,23</sup>  
12  
13  
14 101

15  
16 102 Therefore, the objective of this study was to investigate the inter-tester reliability of commonly  
17  
18 103 used clinical shoulder instability and laxity tests and secondly to describe the mutual dependency  
19  
20 104 for each test evaluated by each tester, in a group of sports-active individuals with and without  
21  
22  
23 105 self-reported shoulder problems.  
24  
25 106



## 107 **Materials and methods**

### 108 **Study design**

109 An inter-tester reliability study was conducted involving two physiotherapists as inter-tester  
110 examiners. A third physiotherapist (study coordinator), not involved in the actual inter-tester  
111 reliability study (test phase), managed all practical aspects during the study period. The Guidelines  
112 for Reporting Reliability and Agreement Studies (GRASS), a consensus document on how to report  
113 reliability and agreement studies, were followed.<sup>24</sup> A standardized protocol for reliability studies,  
114 consisting of three phases: preparation and training of clinical tests, overall agreement, and test  
115 phase (the actual reliability study) were applied.<sup>25</sup> Two early career physiotherapists with six  
116 months clinical experience were involved in the inter-tester reliability study. A test-protocol  
117 describing each clinical test was developed and subsequently used by the two testers to practice  
118 all tests in order to reach uniformity and mutual agreement in performing and interpreting each  
119 test. In the overall agreement phase, the two testers examined 19 individuals (eight affected  
120 shoulders and 11 normal shoulders). The two testers were mutually blinded to the health status of  
121 the individuals (affected shoulders vs. normal shoulders) and also to each other's test results.  
122 Before proceeding to the final study phase, the two testers needed an overall agreement of at  
123 least 80% based on findings from the six clinical shoulder tests.<sup>25</sup> In the actual inter-tester  
124 reliability test phase, the two testers examined a new group of individuals with affected,  
125 respectively normal shoulders with the six clinical shoulder tests. The procedure was the same as  
126 in the agreement phase, meaning that testers were blinded to the health status of the individuals  
127 and each other's test results.

128

129

1  
2  
3  
4 130 **Study subjects**

5  
6 131 A sample size of at least 40 individuals was targeted based on recommendations for performing  
7  
8 132 clinical reliability studies.<sup>25</sup> Sixty-five individuals (women and men (aged 18-60 years)) were  
9  
10 133 recruited and screened for eligibility from Metropolitan University College, Copenhagen, and  
11  
12 134 Bispebjerg Frederiksberg University Hospital, Copenhagen resulting in an included number of 13  
13  
14 135 individuals with instability and/or laxity related shoulder problems (hereinafter referred to as  
15  
16 136 shoulder affected) vs. 27 normal shoulder individuals, respectively.  
17  
18 137 Shoulder affected individuals answering yes to at least one of two questions (*'Do you have a sense*  
19  
20 138 *of shoulder instability?'* and *'Have you ever had a shoulder injury?'*) were eligible for a clinical  
21  
22 139 shoulder examination performed by the study coordinator. The shoulder affected individuals were  
23  
24 140 then included if they present with at least one positive clinical shoulder test out of the following;  
25  
26 141 apprehension, relocation, surprise, load-and-shift, sulcus sign or Gagey. Individuals with normal  
27  
28 142 shoulders were recruited through public advertisements followed by a telephone interview and  
29  
30 143 included if they present with no self-reported shoulder pathology or complaints. In general, any  
31  
32 144 individuals with prior shoulder surgery were excluded. In the actual test phase, individuals  
33  
34 145 completed a short questionnaire with basic demographic details (age, gender, weight, height), in  
35  
36 146 addition to the following: pain level during rest and activity (numeric pain rating scale, NPRS),<sup>26</sup>  
37  
38 147 shoulder injury ever (yes/no), subjective shoulder instability (yes/no) and sports-related activity  
39  
40 148 (hours/week). Further, all individuals completed the patient-reported Western Ontario Shoulder  
41  
42 149 Instability (WOSI) questionnaire designed to measure shoulder function and quality of life in  
43  
44 150 patients with shoulder instability and laxity symptoms.<sup>27</sup> The time period between each test phase  
45  
46 151 was approximately 2 weeks, and new subjects were included for each phase. Only the study phase  
47  
48 152 is reported in the current manuscript. The study was exempted for notification to the Danish  
49  
50  
51  
52  
53  
54  
55  
56  
57  
58  
59  
60

## Inter-tester reliability of clinical shoulder instability and laxity tests

1  
2  
3  
4 153 Health Research Study Board due to the non-invasive and non-treating study design. However,  
5  
6 154 oral and written consent was provided from all individuals and, ethical guidelines were followed  
7  
8  
9 155 according to the Helsinki declaration.<sup>28</sup>  
10

11 156

12  
13 157 **Clinical tests**

14  
15  
16 158 The clinical shoulder tests consisted of three shoulder joint-provoking tests for anterior shoulder  
17  
18 159 instability (apprehension, relocation and surprise) besides three shoulder laxity tests (load and  
19  
20 160 shift, sulcus sign and Gagey) (Table 1).<sup>11,13,14,22,23,29</sup>  
21

22  
23 161 The apprehension test (Table 1, Figure 1) was positive if glenohumeral apprehension and/or pain  
24  
25 162 were evoked during testing whereas relief of symptoms with the relocation test (Table 1, Figure 2)  
26  
27 163 was regarded as a positive test. As for the apprehension, the surprise test (Table 1, Figure 3) was  
28  
29 164 positive if glenohumeral apprehension and/or pain were evoked during testing. The load and shift  
30  
31 165 test (Table 1, Figure 4 & 5) was rated on a four-point scale ranging from 0-3 (best to worst; 0= little  
32  
33 166 glenohumeral movement; 3=humeral head moves beyond the glenoid rim and remains  
34  
35 167 dislocated).<sup>12</sup> Also, to enhance mutual agreement between testers when performing the load-and-  
36  
37 168 shift test, only the direction (anterior vs. posterior) with most glenohumeral head translation was  
38  
39 169 scored. Sulcus sign (Table 1, Figure 6) was objectively measured in centimeter (continuous scale)  
40  
41 170 by use of a small ruler according to previously used grading scales as follows; I (<1 cm translation),  
42  
43 171 II (1 to 2.0 cm translation) or III (>2.0 cm translation).<sup>29</sup> Finally, Gagey test (Table 1, Figure 7) was  
44  
45 172 rated as positive with passive abduction above 105 degrees.<sup>13</sup>  
46  
47  
48

49 173

50  
51  
52 174 **Statistics**

53  
54  
55  
56 175 Demographics and descriptive data were tested for normality by visual inspection of histograms  
57  
58  
59  
60

## Inter-tester reliability of clinical shoulder instability and laxity tests

1  
2  
3  
4 176 and Shapiro-Wilk's test. Group differences (affected shoulders vs. normal shoulders) were tested  
5  
6 177 by Fisher's Exact test for categorical variables, whereas student's t-test and Mann-Whitney U-test  
7  
8  
9 178 was used for parametric, respectively non-parametric distributed data.  
10  
11 179 Apprehension, relocation, surprise and Gagey tests were dichotomous variables whereas the load  
12  
13 180 and shift and sulcus sign tests were dichotomized to also allow for nominal statistics. Thus, load-  
14  
15  
16 181 and-shift was rated positive when scored 2 or 3, while for sulcus sign a positive rating was equal to  
17  
18 182 measurements exceeding one centimeter.<sup>29</sup> For transparency, data from each test is presented by  
19  
20  
21 183 2 x 2 contingency tables besides the use of McNemar's test for significant between-tester  
22  
23 184 differences. Furthermore, observed and expected agreements are presented along with  
24  
25 185 prevalence and bias<sup>30</sup> indexes. Reliability was evaluated with the use of Cohen's kappa ( $k$ )  
26  
27  
28 186 coefficients including 95% confidence intervals (CI).<sup>25</sup> Also, since kappa is sensitive to imbalances  
29  
30 187 in prevalence and bias (e.g. if a 50/50 distribution of positive and negative tests cannot be  
31  
32 188 accomplished) the use of PABAK calculation is a valid supplement to the original kappa values.<sup>30,31</sup>  
33  
34  
35 189 By definition, PABAK reflects the ideal situation, thereby accounting for variation of prevalence  
36  
37 190 and bias between testers (as presented in the "real" world).<sup>32</sup> PABAK calculation is performed by  
38  
39 191 adjusting for high or low prevalence by computing the average of cells a and d in a cross table,  
40  
41 192 substituting this value for the actual values in those cells. Similarly, an adjustment for bias is  
42  
43  
44 193 achieved by substituting the mean of cells b and c for those actual cell values.<sup>30</sup> Finally, the  
45  
46 194 relationship for each tester between the individual tests and the classification (mutual  
47  
48  
49 195 dependency) by self-reported shoulder problems was tested by Cohen's kappa ( $k$ ) coefficients and  
50  
51 196 the characterization of the groups was tested with Fischer's exact tests.  
52  
53 197 The classification system proposed by Landis and Koch was used to interpret reliability as follows:  
54  
55  
56 198 0.00-0.20 (Slight); 0.21-0.40 (Fair); 0.41-0.60 (Moderate); 0.61-0.80 (Substantial) and 0.81-1.00  
57  
58  
59  
60

## Inter-tester reliability of clinical shoulder instability and laxity tests

1  
2  
3  
4 199 (Almost perfect).<sup>33</sup>  
5

6 200 Statistical Package for the Social Sciences (SPSS inc., Chicago, IL, USA), version 22, was used for all  
7

8  
9 201 statistical analyses, with p-value of <0.05 interpreted as significant.  
10  
11  
12  
13  
14  
15  
16  
17  
18  
19  
20  
21  
22  
23  
24  
25  
26  
27  
28  
29  
30  
31  
32  
33  
34  
35  
36  
37  
38  
39  
40  
41  
42  
43  
44  
45  
46  
47  
48  
49  
50  
51  
52  
53  
54  
55  
56  
57  
58  
59  
60

For peer review only

## Inter-tester reliability of clinical shoulder instability and laxity tests

**Table 1.** Performance and evaluation of the clinical shoulder instability and laxity tests**Verbal introduction:**

1. I am going to perform six clinical shoulder tests on you
2. I will ask if you experience any symptoms (apprehension and/or pain) during the three first tests.
3. I will guide you through each test

| Clinical tests  | Description                                                                                                     | Placing of hands, etc.                                                                                                            | Evaluation                                                                                                        |
|-----------------|-----------------------------------------------------------------------------------------------------------------|-----------------------------------------------------------------------------------------------------------------------------------|-------------------------------------------------------------------------------------------------------------------|
| <b>Figure 1</b> | Individuals placed supine with the shoulder being tested close to the edge of the examination table.            | One hand around the wrist of the individual with the other hand gently placed in front of the shoulder.                           | Subjective or objective presence of apprehension and/or pain?                                                     |
|                 | Shoulder positioned in 90° of abduction, elbow flexed to 90°.                                                   | Elbow supported at the examiners thigh.                                                                                           | Rated as either positive or negative.                                                                             |
|                 | Examiner moves the shoulder into maximal external rotation.                                                     |                                                                                                                                   | (Nominal, dichotome data)                                                                                         |
| <b>Figure 2</b> | From the end position of the apprehension test the humeral head is gently forced posteriorly                    | Examiners fifth finger placed close to the lateral part of the acromion with the wrist positioned anteriorly at the humeral head. | Relief of apprehension and/or pain?<br><br>Rated as either positive or negative.<br><br>(Nominal, dichotome data) |
|                 | From end position of the relocation test the posteriorly directed force at the humeral head is quickly removed. | Removal of examiners wrist from the anterior part of the shoulder.                                                                | Subjective or objective reproduction of apprehension and/or pain?<br><br>Rated as either positive or              |

## Inter-tester reliability of clinical shoulder instability and laxity tests

|                 |                                                                                                                                                                                                                                                                                                                                                                     |                                                                                                                                                                                                                                                                                               |                                                                                                                                                                                                                                                          |
|-----------------|---------------------------------------------------------------------------------------------------------------------------------------------------------------------------------------------------------------------------------------------------------------------------------------------------------------------------------------------------------------------|-----------------------------------------------------------------------------------------------------------------------------------------------------------------------------------------------------------------------------------------------------------------------------------------------|----------------------------------------------------------------------------------------------------------------------------------------------------------------------------------------------------------------------------------------------------------|
|                 |                                                                                                                                                                                                                                                                                                                                                                     |                                                                                                                                                                                                                                                                                               | negative.                                                                                                                                                                                                                                                |
|                 |                                                                                                                                                                                                                                                                                                                                                                     |                                                                                                                                                                                                                                                                                               | (Nominal, dichotome data)                                                                                                                                                                                                                                |
| <b>Figure 4</b> | Individual placed supine with scapula resting at the examination table.<br>Humeral head is loaded gently into the glenoid through axial pressure at the elbow.                                                                                                                                                                                                      | Examiners one hand placed at the olecranon with the individual's hand positioned between the examiners torso and elbow.                                                                                                                                                                       | Humeral head movement evaluated by the use of a four-level laxity scale.<br><br>0 = little to almost no movement<br><br>1 = humeral head moves up onto the glenoid                                                                                       |
| <b>Figure 5</b> | <i>Anterior load-and-shift test:</i><br>Shoulder positioned in the scapular plane in 90° of abduction with elbow flexed.<br>Humeral head gently shifted in anterior direction.<br><br><i>Posterior load-and-shift test:</i> Shoulder positioned in the scapular plane in 20° of abduction with elbow flexed.<br>Humeral head gently shifted in posterior direction. | <i>Anterior load-and-shift:</i> Examiners hand placed on top of the shoulder with the fingers on the backside of the glenohumeral head to move it anteriorly.<br><br><i>Posterior load-and-shift:</i> Examiners wrist placed at the anterior part of the humeral head to move it posteriorly. | 2 = humeral head moves beyond the glenoid, but relocates spontaneously once pressure is released<br><br>3 = humeral head moves beyond the glenoid and remains dislocated<br><br>Rated as positive when scored 2 or 3.<br><br>(Nominal, dichotomous data) |
| <b>Figure 6</b> | Individuals sitting upright. Shoulder in neutral position (0 degree rotation).                                                                                                                                                                                                                                                                                      | One hand placed above the epicondyles of humerus.                                                                                                                                                                                                                                             | Rated as positive with measurements exceeding 1 centimeter.                                                                                                                                                                                              |

1  
2  
3  
4  
5  
6  
7  
8  
9  
10  
11  
12  
13  
14  
15  
16  
17  
18  
19  
20  
21  
22  
23  
24  
25  
26  
27  
28  
29  
30  
31  
32  
33  
34  
35  
36  
37  
38  
39  
40  
41  
42  
43  
44  
45  
46  
47  
48  
49

Inter-tester reliability of clinical shoulder instability and laxity tests

|                 |                                                                                                                                                                                                                           |                                                                                                 |                                                                                            |
|-----------------|---------------------------------------------------------------------------------------------------------------------------------------------------------------------------------------------------------------------------|-------------------------------------------------------------------------------------------------|--------------------------------------------------------------------------------------------|
|                 | Examiner pulls the distal part of the humerus in a caudal direction.                                                                                                                                                      | Other hand is used to evaluate the subacromial distance with a ruler.                           | (Nominal, dichotome data)                                                                  |
|                 | Distance from the top of the humeral head and the acromion is evaluated with a ruler.                                                                                                                                     |                                                                                                 |                                                                                            |
| <b>Figure 7</b> | Individuals sitting upright.<br><br>The shoulder girdle is stabilized by examiners forearm preventing the shoulder girdle to elevate while the individuals arm is passively moved into end range in horizontal abduction. | Forearm placed on top of the shoulder girdle with the other hand placed around the elbow joint. | Rated as positive with abduction exceeding 105 degrees.<br><br>(Nominal, dichotomous data) |
|                 | A mirror in front of the individual is used to evaluate the shoulder abduction angle.                                                                                                                                     |                                                                                                 |                                                                                            |



## Inter-tester reliability of clinical shoulder instability and laxity tests

202 **Results**

203 Characteristics of the participating individuals are presented in Table 2. Demographics  
 204 showed no difference between the individuals with affected shoulders (n=13) and  
 205 normal shoulders (n=27). Furthermore, both groups (92 and 74%; p=0.18) were  
 206 relatively active with a weekly participation in sports-related activity for more than  
 207 four hours per week. However, as expected due to the design, affected shoulders had  
 208 significantly higher pain during activity (4.23 vs. 1.44; p=0.02), higher frequency of  
 209 shoulder injury ever (62% vs. <1%; p<0.001), higher subjective shoulder instability (69  
 210 vs. 11%; p<0.001) and worse total WOSI score (506 vs. 136; p=0.001) (Table 2).

212 **Table 2.** Study phase. Participant characteristics.

|                                                | Affected<br>shoulders<br>(n=13) | Normal<br>shoulders<br>(n=27) | P-value |
|------------------------------------------------|---------------------------------|-------------------------------|---------|
| Sex (women/men)                                | 8/5                             | 21/6                          | 0.28    |
| Age (years) mean (SD)                          | 28 (9)                          | 29 (7)                        | 0.72    |
| Weight (kg)* mean (SD)                         | 71.0 (12.8)                     | 74.9 (23.4)                   | 0.59    |
| Height (cm) mean (SD)                          | 174.0 (8.6)                     | 173.4 (7.9)                   | 0.82    |
| Pain, rest (NRS 0-10) mean (SD)                | 1.08 (1.44)                     | 0.41 (1.15)                   | 0.12    |
| Pain, activity (NRS 0-10) mean (SD)            | 4.23 (2.92)                     | 1.44 (2.12)                   | <0.05   |
| Shoulder injury ever, n (%)                    | 8 (62)                          | 1 (4)                         | <0.001  |
| Subjective shoulder instability, n (%)         | 9 (69)                          | 3 (11)                        | <0.001  |
| Sports-related activity (>4 hours/week), n (%) | 12 (92)                         | 20 (74)                       | 0.18    |
| WOSI domains, mean (SD)                        |                                 |                               |         |
| - Physical symptoms (0-1000)                   | 225 (165)                       | 60 (78)                       | <0.05   |
| - Sports, recreation, work (0-400)             | 103 (93)                        | 24 (47)                       | <0.05   |
| - Lifestyle (0-400)                            | 58 (57)                         | 13 (21)                       | <0.05   |
| - Emotions (0-300)                             | 121 (94)                        | 39 (49)                       | <0.05   |
| WOSI total score (0-2100) mean (SD)            | 506 (362)                       | 136 (174)                     | <0.001  |

SD Standard deviation; kg kilo; \* significance level p < 0.05; cm centimeter NRS Numeric Rating Scale

213

214

215

## Inter-tester reliability of clinical shoulder instability and laxity tests

216 Prevalence of positive tests was especially low for the load-and-shift test (table 3), and  
 217 significant between-tester differences were found for relocation and sulcus sign tests  
 218 ( $p=0.021$ ) (not shown in tables).

219

220 **Table 3.** Contingency tables with findings from tester A and B.

| Apprehension |     | A   |    |
|--------------|-----|-----|----|
|              |     | Yes | No |
| B            | Yes | 14  | 4  |
|              | No  | 3   | 19 |

| Relocation |     | A   |    |
|------------|-----|-----|----|
|            |     | Yes | No |
| B          | Yes | 6   | 2  |
|            | No  | 8   | 24 |

| Surprise |     | A   |    |
|----------|-----|-----|----|
|          |     | Yes | No |
| B        | Yes | 14  | 4  |
|          | No  | 3   | 19 |

  

| Load-and-shift |     | A   |    |
|----------------|-----|-----|----|
|                |     | Yes | No |
| B              | Yes | 1   | 0  |
|                | No  | 2   | 37 |

| Sulcus |     | A   |    |
|--------|-----|-----|----|
|        |     | Yes | No |
| B      | Yes | 7   | 1  |
|        | No  | 9   | 23 |

| Gagey |     | A   |    |
|-------|-----|-----|----|
|       |     | Yes | No |
| B     | Yes | 8   | 3  |
|       | No  | 1   | 28 |

221

222

223 Reliability varied between  $k$ : 0.39-0.73 (95% CI: 0.00-1.00), indicating fair (relocation;  $k$   
 224 0.39), moderate (load-and-shift, sulcus sign;  $k$  0.43 and 0.48) and substantial  
 225 (apprehension, surprise, Gagey;  $k$  0.65-0.73) reliability (Table 4). The prevalence index  
 226 of all six tests ranged from 0.05-0.44, (lowest for load-and-shift, relocation and sulcus;  
 227 0.05, 0.28 and 0.30), whereas the bias index ranged from and 0.03-0.20 (highest for  
 228 relocation and sulcus). PABAK improved reliability for relocation, load-and-shift, sulcus  
 229 sign and Gagey test, now corresponding to moderate (relocation and sulcus sign;  $k$   
 230 0.50), substantial (Gagey;  $k$ : 0.80) and almost perfect (load and shift;  $k$ : 0.90) reliability  
 231 (Table 4).

232

233

## Inter-tester reliability of clinical shoulder instability and laxity tests

**Table 4.** Reliability of six clinical shoulder instability and laxity tests.

|                       | Observed agreement | Expected agreement | Prevalence index | Bias index | Kappa (95% CI)    | PABAK |
|-----------------------|--------------------|--------------------|------------------|------------|-------------------|-------|
| <b>Apprehension</b>   | 0.83               | 0.51               | 0.44             | 0.03       | 0.65 (0.38; 0.85) | 0.65  |
| <b>Relocation*</b>    | 0.75               | 0.59               | 0.28             | 0.15       | 0.39 (0.07; 0.68) | 0.50  |
| <b>Surprise</b>       | 0.83               | 0.51               | 0.44             | 0.03       | 0.65 (0.38; 0.85) | 0.65  |
| <b>Load and Shift</b> | 0.95               | 0.90               | 0.05             | 0.05       | 0.48 (0.00; 1.00) | 0.90  |
| <b>Sulcus sign*</b>   | 0.75               | 0.56               | 0.30             | 0.20       | 0.43 (0.17; 0.72) | 0.50  |
| <b>Gagey</b>          | 0.90               | 0.62               | 0.40             | 0.05       | 0.73 (0.46; 0.94) | 0.80  |

\*Significant inter-tester differences, CI Confidence intervals, PABAK prevalence-and-bias-adjusted kappa

The *k* values for mutual dependency indicate that apprehension, relocation and surprise tests for both examiners were the most frequently used tests for characterizing self-reported shoulder problems (Table 5). This was further confirmed by the significant group difference in the presence of positive tests.

**Table 5.** Kappa statistics for mutual dependency of the individual tests and self-reported shoulder problems for each tester.

|                       | Observed agreement | Expected agreement | Prevalence index | Kappa | p-value (AS/NS) |
|-----------------------|--------------------|--------------------|------------------|-------|-----------------|
| <b>Apprehension</b>   |                    |                    |                  |       |                 |
| Examiner A            | 0.75               | 0.53               | 0.38             | 0.47  | 0.003           |
| Examiner B            | 0.68               | 0.52               | 0.40             | 0.33  | 0.04            |
| <b>Relocation*</b>    |                    |                    |                  |       |                 |
| Examiner A            | 0.83               | 0.55               | 0.35             | 0.61  | <0.001          |
| Examiner B            | 0.73               | 0.63               | 0.25             | 0.27  | 0.08            |
| <b>Surprise</b>       |                    |                    |                  |       |                 |
| Examiner A            | 0.75               | 0.53               | 0.38             | 0.47  | 0.003           |
| Examiner B            | 0.68               | 0.52               | 0.40             | 0.33  | 0.04            |
| <b>Load and Shift</b> |                    |                    |                  |       |                 |
| Examiner A            | 0.75               | 0.65               | 0.20             | 0.29  | 0.03            |
| Examiner B            | 0.70               | 0.67               | 0.18             | 0.10  | 0.33            |
| <b>Sulcus sign*</b>   |                    |                    |                  |       |                 |
| Examiner A            | 0.63               | 0.61               | 0.28             | 0.05  | 0.52            |
| Examiner B            | 0.63               | 0.54               | 0.38             | 0.19  | 0.19            |
| <b>Gagey</b>          |                    |                    |                  |       |                 |
| Examiner A            | 0.70               | 0.60               | 0.28             | 0.26  | 0.10            |
| Examiner B            | 0.70               | 0.58               | 0.30             | 0.29  | 0.08            |

AS affected shoulders; NS normal shoulder; \*Significant inter-tester differences

## 243 Discussion

244 The inter-tester reliability across the selected six clinical shoulder instability and laxity  
245 tests ranged from fair to substantial. Use of PABAK calculations improved inter-tester  
246 reliability to substantial and almost perfect across most tests, except for the relocation  
247 and sulcus sign tests. The tests most often used to characterize self-reported shoulder  
248 instability and laxity (mutual dependency) were apprehension, relocation and surprise  
249 tests.

250  
251 The inter-tester reliability for the apprehension, relocation and surprise was higher  
252 than, or equivalent, to previously reported results of these tests using the same  
253 diagnostic procedures (apprehension and/or pain).<sup>23</sup> Specifically for the apprehension  
254 and surprise test, the present *k* values were somewhat higher than previously reported  
255 (0.65 vs. 0.44-0.45). The reason for this may be that the current study included both  
256 affected and normal shoulder individuals as opposed to only including symptomatic  
257 subjects.<sup>23</sup> This may have increased subject variation, known to affect reliability  
258 positively. Also, PABAK calculations did not affect the overall reliability of the  
259 apprehension and surprise tests, probably due to an optimal prevalence index of  
260 positive and negative tests (close to 0.50). For the relocation test, the existing inter-  
261 tester reliability was almost similar to previously reported (*k* 0.39 vs. 0.44),<sup>23</sup> however  
262 lower. Apparently, the primary reason for the current poor reliability in relocation was  
263 presence of systematic bias between testers, as indicated by the actual raw data  
264 (contingency tables) and the statistical significant inter-examiner difference. Likewise,  
265 systematic bias between testers was also found for the sulcus sign test in the present

## Inter-tester reliability of clinical shoulder instability and laxity tests

1  
2  
3  
4 266 study. Hypothetically, this may be explained by inter-tester variability in the force  
5  
6 267 produced to translate the humeral head in posterior (relocation test) or inferior (sulcus  
7  
8 268 sign test) direction, in the current study. This is, however, only speculative and further  
9  
10 269 studies are needed to standardize these tests.

11  
12  
13 270 Reliability for the present sulcus sign test was slightly lower than previously reported ( $k$   
14  
15 271 0.39 vs.  $>0.50$ ).<sup>22,23</sup> The discrepancy in reliability observed may be due to the use of  
16  
17 272 different test positions with participants in the current study sitting upright<sup>29</sup> as  
18  
19 273 opposed to a previous lying test position.<sup>22</sup> However, due to the presence of  
20  
21 274 systematic bias in both the relocation and sulcus sign test, PABAK did not affect the  
22  
23 275 overall reliability much.

24  
25  
26  
27 276 For the load-and-shift test, reliability was relatively low (including wide CI). This may be  
28  
29 277 due to the current low prevalence index below 50%, which is the optimum prevalence  
30  
31 278 in reliability studies.<sup>25</sup> However, the present dichotomous rating of the load-and-shift  
32  
33 279 test (meaning that only individuals that could either subluxate or dislocate the  
34  
35 280 shoulder during testing was deemed positive) may have influenced the prevalence of  
36  
37 281 positive tests largely. Therefore, using PABAK, reliability of the load-and-shift test  
38  
39 282 improved considerably (from moderate to almost perfect). Nevertheless, different  
40  
41 283 statistics (kappa vs. Intra-class-Correlation Coefficients), different scoring systems  
42  
43 284 (dichotomous rating (positive yes/no) vs. four point grading scale (0-3)<sup>23</sup> and inclusion  
44  
45 285 of shoulder asymptomatic athletes only<sup>22</sup> make comparison across studies difficult.

46  
47 286 Finally, reliability of the Gagey test was substantial and PABAK did not affect reliability  
48  
49 287 much due to a nearly optimal prevalence and low bias between testers. Unfortunately,  
50  
51 288 there is no other study to compare with.  
52  
53  
54  
55  
56  
57  
58  
59  
60

## Inter-tester reliability of clinical shoulder instability and laxity tests

1  
2  
3  
4 289 Although the current study was designed to investigate reliability, and not diagnostic  
5  
6 290 accuracy, the mutual dependency between the individual tests and self-reported  
7  
8 291 shoulder problems was analysed. It revealed that the tests most often used to  
9  
10 292 characterize those with and without self-reported shoulder instability and laxity  
11  
12 293 (mutual dependency) proved to be the apprehension, relocation and surprise tests.  
13  
14 294 This may indicate a relationship between these tests, which may come as no surprise,  
15  
16 295 since these tests are a continuum of the apprehension test and, thus, closely related.<sup>9</sup>  
17  
18 296 Nevertheless, for clinicians it is of interest to specify the clinical characteristics of  
19  
20 297 patients with self-reported shoulder problems. Thus, the current prevalence of  
21  
22 298 positive tests may mirror these characteristics of the included patients and should be  
23  
24 299 taken into consideration in the management of such musculoskeletal conditions. It is  
25  
26 300 recommended to develop and test the clinimetric properties of a more comprehensive  
27  
28 301 test battery for evaluating such self-reported shoulder problems. No prior studies were  
29  
30 302 found addressing mutual dependency of the current tests for shoulder instability and  
31  
32 303 laxity, which hampers comparison.  
33  
34 304 The present study has several limitations. Firstly, the lack of standardized  
35  
36 305 measurement of the amount of force exerted by the two testers during especially the  
37  
38 306 relocation and sulcus sign test may have limited the current inter-tester reliability.  
39  
40 307 Further standardization in both performance and interpretation is therefore needed.  
41  
42 308 Also, the current study did not randomize the order of the clinical tests. However, we  
43  
44 309 do not believe this to have biased the reliability of the data, since the same order was  
45  
46 310 used for both testers.  
47  
48 311 Secondly, no valid gold standard for classifying shoulder instability and laxity was used.  
49  
50  
51  
52  
53  
54  
55  
56  
57  
58  
59  
60

## Inter-tester reliability of clinical shoulder instability and laxity tests

1  
2  
3  
4 312 To compensate for this, self-reported confirmation of shoulder-related problems was  
5  
6 313 applied, but this was not reflected in the current WOSI scores, which were relatively  
7  
8 314 low. Lack of a more objective gold standard may have decreased diagnostic accuracy,  
9  
10 315 however not reliability, which was the primary objective of the present study. Also, in  
11  
12 316 the group with normal shoulders, one individual reported to have had a previous  
13  
14 317 shoulder injury and three individuals reported subjective shoulder instability, which  
15  
16 318 does not comply with the inclusion criteria for being regarded as shoulder healthy in  
17  
18 319 the current study. At the clinical session, a self-reported questionnaire was completed  
19  
20 320 regarding demographic data and historical information. Apparently, in the baseline  
21  
22 321 questionnaire three shoulder healthy individuals answered yes to perceiving instability  
23  
24 322 in their shoulder and one had had a previous shoulder injury, even though they all had  
25  
26 323 reported no shoulder trouble during the telephone inclusion interview. However, as  
27  
28 324 depicted in table 2, WOSI and pain scores in the group with normal shoulders seem  
29  
30 325 not to be influenced severely by these four individuals. Also, re-calculations of  
31  
32 326 demographic data and mutual dependency with the revised classification into  
33  
34 327 affected/normal shoulders did not change the mutual dependency of the most  
35  
36 328 frequently used tests for classification into affected/normal shoulders, and neither was  
37  
38 329 kappa and demographics affected (data not shown).  
39  
40 330 Thirdly, due to a relative short recruitment period besides difficulties in recruiting  
41  
42 331 subjects with shoulder instability and laxity only thirteen subjects with an affected  
43  
44 332 shoulder were included. Naturally, this also affected the prevalence of positive and  
45  
46 333 negative test findings meaning that the prevalence of 0.50, as recommended in  
47  
48 334 reliability studies,<sup>25</sup> in all six tests was not accomplished. However, to overcome this,  
49  
50  
51  
52  
53  
54  
55  
56  
57  
58  
59  
60

## Inter-tester reliability of clinical shoulder instability and laxity tests

1  
2  
3  
4 335 PABAK calculations was used and reported along with kappa, to show transparently  
5  
6 336 how data would have been with equal distributions of positive and negative test  
7  
8  
9 337 results. Nevertheless, future studies should use inclusion criteria of more established  
10  
11 338 shoulder instability and laxity conditions, and, if possible, verified by objective criteria  
12  
13 339 as surrogate for a gold standard of shoulder instability and laxity. This may optimize  
14  
15 340 prevalence as well as diagnostic accuracy in studies where this is a further aim.  
16  
17  
18 341 The strengths of the study are the use of standardized procedures (including blinding  
19  
20 342 to patient status and the use of a three-phased protocol for conducting reliability  
21  
22 343 studies). Also, presentation of raw data, using contingency tables, along with kappa  
23  
24 344 and PABAK values, increases data transparency and improves interpretation of the  
25  
26 345 reliability study.  
27  
28  
29  
30

### 31 346 **Conclusions**

32  
33 347 This study showed acceptable inter-tester reliability for four of six clinical shoulder  
34  
35 348 instability and laxity tests in relatively sports active individuals with and without self-  
36  
37 349 reported shoulder problems. However, relocation and sulcus sign tests need further  
38  
39 350 standardisation before being recommended for use in clinical practice. Based on the  
40  
41 351 frequency and mutual dependency of the current tests, especially apprehension and  
42  
43 352 surprise tests seem important in the characterisation of self-reported shoulder  
44  
45 353 problems. Future research on the validity of tests for shoulder instability and laxity is  
46  
47 354 needed.  
48  
49  
50  
51

52 355  
53  
54  
55 356  
56  
57  
58  
59  
60



## Inter-tester reliability of clinical shoulder instability and laxity tests

1  
2  
3  
4 357 **Author statement:** HE, KGI, CML and BJK conceived and designed the study. HE and  
5  
6 358 BHK recruited study participants and collected data. HE performed the statistical  
7  
8  
9 359 analysis. HE, KGI, CML, BJK interpreted the results. HE drafted the manuscript with KGI,  
10  
11 360 CML, BHK and BJK contributing to the manuscript. All authors have read and approved  
12  
13 361 the final manuscript. HE is the guarantor.  
14

15  
16 362

17  
18 363 **Consent for publication:** The depicted individuals in Table 1 have provided written  
19  
20 364 consent for publication of the pictures.  
21

22  
23 365

24  
25 366 **Funding:** This work was supported by Region of Southern Denmark's Research fund  
26  
27 367 and The Danish Rheumatism Association.  
28

29  
30 368

31  
32 369 **Competing interest:** None declared  
33

34  
35 370

36  
37 371 **Data sharing statement:** No additional data are available  
38

39  
40 372  
41  
42  
43  
44  
45  
46  
47  
48  
49  
50  
51  
52  
53  
54  
55  
56  
57  
58  
59  
60

## References

1. Luime, J. J., B. W. Koes, I. J. Hendriksen, A. Burdorf, A. P. Verhagen, H. S. Miedema, and J. A. Verhaar. 2004. 'Prevalence and incidence of shoulder pain in the general population; a systematic review', *Scandinavian Journal of Rheumatology*, 33: 73-81.
2. Farrar, N. G., J. J. Malal, J. Fischer, and M. Waseem. 2013. 'An overview of shoulder instability and its management', *Open Orthopaedics Journal*, 7: 338-46.
3. Goss, T. P. 1988. 'Anterior glenohumeral instability', *Orthopedics*, 11: 87-95.
4. Cameron, K. L., M. L. Duffey, T. M. DeBerardino, P. D. Stoneman, C. J. Jones, and B. D. Owens. 2010. 'Association of generalized joint hypermobility with a history of glenohumeral joint instability', *J Athl Train*, 45: 253-8.
5. Chahal, J., J. Leiter, M. D. McKee, and D. B. Whelan. 2010. 'Generalized ligamentous laxity as a predisposing factor for primary traumatic anterior shoulder dislocation', *J Shoulder Elbow Surg*, 19: 1238-42.
6. Dodson, C. C., and F. A. Cordasco. 2008. 'Anterior glenohumeral joint dislocations', *Orthop Clin North Am*, 39: 507-18, vii.
7. Jaggi, A., and S. Lambert. 2010. 'Rehabilitation for shoulder instability', *Br J Sports Med*, 44: 333-40.
8. Wilk, K. E., L. C. Macrina, and M. M. Reinold. 2006. 'Non-operative rehabilitation for traumatic and atraumatic glenohumeral instability', *N Am J Sports Phys Ther*, 1: 16-31.
9. Hegedus, E. J., A. P. Goode, C. E. Cook, L. Michener, C. A. Myer, D. M. Myer, and A. A. Wright. 2012. 'Which physical examination tests provide clinicians with the most value when examining the shoulder? Update of a systematic review with meta-analysis of individual tests', *Br J Sports Med*, 46: 964-78.
10. Ann Ganestam, Mikkel L. Attrup, Per Hølmich and Kristoffer W Barfoed. 2015. 'Evaluation of Clinical Practice of Shoulder Examination among Ten Experienced Shoulder Surgeons', *Journal of Orthopaedic Research and Physiotherapy*, 1.
11. Luime, J. J., A. P. Verhagen, H. S. Miedema, J. I. Kuiper, A. Burdorf, J. A. Verhaar, and B. W. Koes. 2004. 'Does this patient have an instability of the shoulder or a labrum lesion?', *JAMA*, 292: 1989-99.
12. Tzannes, A., and G. A. Murrell. 2002. 'Clinical examination of the unstable shoulder', *Sports Medicine*, 32: 447-57.
13. Gagey, O. J., and N. Gagey. 2001. 'The hyperabduction test', *J Bone Joint Surg Br*,

## Inter-tester reliability of clinical shoulder instability and laxity tests

- 1  
2  
3  
4 418 83: 69-74.  
5 419  
6 420 14. Lo, I. K., B. Nonweiler, M. Woolfrey, R. Litchfield, and A. Kirkley. 2004. 'An  
7 421 evaluation of the apprehension, relocation, and surprise tests for anterior shoulder  
8 422 instability', *Am J Sports Med*, 32: 301-7.  
9 423  
10 424 15. Silliman, J. F., and R. J. Hawkins. 1993. 'Classification and physical diagnosis of  
11 425 instability of the shoulder', *Clin Orthop Relat Res*: 7-19.  
12 426  
13 427 16. Cavallo, R. J., and K. P. Speer. 1998. 'Shoulder instability and impingement in  
14 428 throwing athletes', *Med Sci Sports Exerc*, 30: S18-25.  
15 429  
16 430 17. Matsen, F. A., 3rd, and J. D. Zuckerman. 1983. 'Anterior glenohumeral  
17 431 instability', *Clin Sports Med*, 2: 319-38.  
18 432  
19 433 18. Robinson, C. M., J. Howes, H. Murdoch, E. Will, and C. Graham. 2006. 'Functional  
20 434 outcome and risk of recurrent instability after primary traumatic anterior shoulder  
21 435 dislocation in young patients', *J Bone Joint Surg Am*, 88: 2326-36.  
22 436  
23 437 19. van Kampen, D. A., T. van den Berg, H. J. van der Woude, R. M. Castelein, C. B.  
24 438 Terwee, and W. J. Willems. 2013. 'Diagnostic value of patient characteristics,  
25 439 history, and six clinical tests for traumatic anterior shoulder instability', *J Shoulder  
26 440 Elbow Surg*, 22: 1310-9.  
27 441  
28 442 20. Warby, S. A., T. Pizzari, J. J. Ford, A. J. Hahne, and L. Watson. 2014. 'The effect of  
29 443 exercise-based management for multidirectional instability of the glenohumeral  
30 444 joint: a systematic review', *J Shoulder Elbow Surg*, 23: 128-42.  
31 445  
32 446 21. Gibson, K., A. Growse, L. Korda, E. Wray, and J. C. MacDermid. 2004. 'The  
33 447 effectiveness of rehabilitation for nonoperative management of shoulder  
34 448 instability: a systematic review', *J Hand Ther*, 17: 229-42.  
35 449  
36 450 22. Levy, A. S., S. Lintner, K. Kenter, and K. P. Speer. 1999. 'Intra- and interobserver  
37 451 reproducibility of the shoulder laxity examination', *Am J Sports Med*, 27: 460-3.  
38 452  
39 453 23. Tzannes, A., A. Paxinos, M. Callanan, and G. A. Murrell. 2004. 'An assessment of  
40 454 the interexaminer reliability of tests for shoulder instability', *J Shoulder Elbow  
41 455 Surg*, 13: 18-23.  
42 456  
43 457 24. Kottner, J., L. Audige, S. Brorson, A. Donner, B. J. Gajewski, A. Hrobjartsson, C.  
44 458 Roberts, M. Shoukri, and D. L. Streiner. 2011. 'Guidelines for Reporting Reliability  
45 459 and Agreement Studies (GRRAS) were proposed', *J Clin Epidemiol*. 64 (1): 96-106.  
46 460  
47 461 25. Patijn J, Remvig L. . 2007. "Reproducibility And Validity 2007-Protocol Formats  
48 462 For Diagnostics Procedures In Manual/Musculoskeletal Medicine." In.

## Inter-tester reliability of clinical shoulder instability and laxity tests

- 1  
2  
3  
4 463  
5 464 26. Downie, W. W., P. A. Leatham, V. M. Rhind, V. Wright, J. A. Branco, and J. A.  
6 465 Anderson. 1978. 'Studies with pain rating scales', *Annals of the Rheumatic Diseases*,  
7 466 37: 378-81.  
8 467  
9  
10 468 27. Kirkley, A., S. Griffin, H. McLintock, and L. Ng. 1998. 'The development and  
11 469 evaluation of a disease-specific quality of life measurement tool for shoulder  
12 470 instability. The Western Ontario Shoulder Instability Index (WOSI)', *Am J Sports*  
13 471 *Med*, 26: 764-72.  
14 472  
15  
16 473 28. 'World Medical Association Declaration of Helsinki: ethical principles for  
17 474 medical research involving human subjects'. 2000. *JAMA*, 284: 3043-5.  
18 475  
19 476 29. Bahk, M., E. Keyurapan, A. Tasaki, E. L. Sauers, and E. G. McFarland. 2007.  
20 477 'Laxity testing of the shoulder: a review', *Am J Sports Med*, 35: 131-44.  
21 478  
22  
23 479 30. Sim, J., and C. C. Wright. 2005. 'The kappa statistic in reliability studies: use,  
24 480 interpretation, and sample size requirements', *Phys Ther*, 85: 257-68.  
25 481  
26  
27 482 31. Byrt, T., J. Bishop, and J. B. Carlin. 1993. 'Bias, prevalence and kappa', *J Clin*  
28 483 *Epidemiol*, 46: 423-9.  
29 484  
30 485 32. Hoehler, F. K. 2000. 'Bias and prevalence effects on kappa viewed in terms of  
31 486 sensitivity and specificity', *J Clin Epidemiol*, 53: 499-503.  
32 487  
33  
34 488 33. Landis, J. R., and G. G. Koch. 1977. 'The measurement of observer agreement for  
35 489 categorical data', *Biometrics*, 33: 159-74.  
36  
37  
38  
39  
40  
41  
42  
43  
44  
45  
46  
47  
48  
49  
50  
51  
52  
53  
54  
55  
56  
57  
58  
59  
60

## Inter-tester reliability of clinical shoulder instability and laxity tests

490 **Figure legends**

491

492 Figure 1. Apprehension

493

494 Figure 2. Relocation

495

496 Figure 3. Surprise

497

498 Figure 4. Load and shift – anterior direction

499

500 Figure 5. Load and shift – posterior direction

501

502 Figure 6. Sulcus sign

503

504 Figure 7. Gagey

1  
2  
3  
4  
5  
6  
7  
8  
9  
10  
11  
12  
13  
14  
15  
16  
17  
18  
19  
20  
21  
22  
23  
24  
25  
26  
27  
28  
29  
30  
31  
32  
33  
34  
35  
36  
37  
38  
39  
40  
41  
42  
43  
44  
45  
46  
47  
48  
49  
50  
51  
52  
53  
54  
55  
56  
57  
58  
59  
60

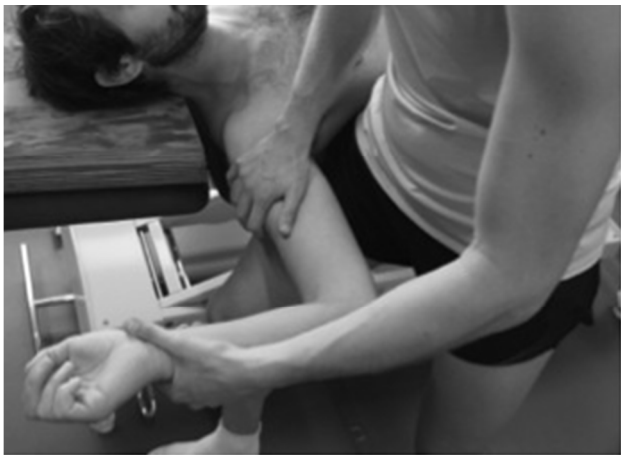

Table 1, Figure 1

26x19mm (300 x 300 DPI)

er review only

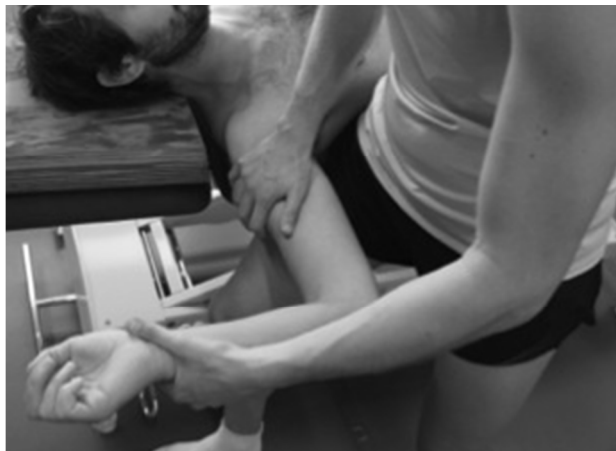

Table 1, Figure 2

26x19mm (300 x 300 DPI)

er review only

1  
2  
3  
4  
5  
6  
7  
8  
9  
10  
11  
12  
13  
14  
15  
16  
17  
18  
19  
20  
21  
22  
23  
24  
25  
26  
27  
28  
29  
30  
31  
32  
33  
34  
35  
36  
37  
38  
39  
40  
41  
42  
43  
44  
45  
46  
47  
48  
49  
50  
51  
52  
53  
54  
55  
56  
57  
58  
59  
60

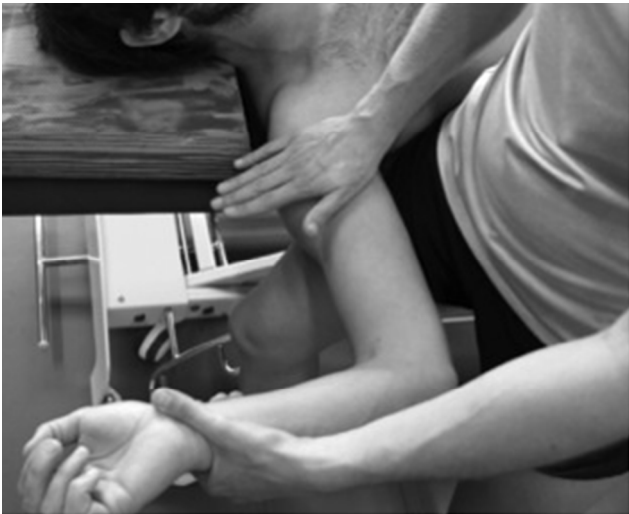

Table 1, Figure 3

26x21mm (300 x 300 DPI)

review only



1  
2  
3  
4  
5  
6  
7  
8  
9  
10  
11  
12  
13  
14  
15  
16  
17  
18  
19  
20  
21  
22  
23  
24  
25  
26  
27  
28  
29  
30  
31  
32  
33  
34  
35  
36  
37  
38  
39  
40  
41  
42  
43  
44  
45  
46  
47  
48  
49  
50  
51  
52  
53  
54  
55  
56  
57  
58  
59  
60

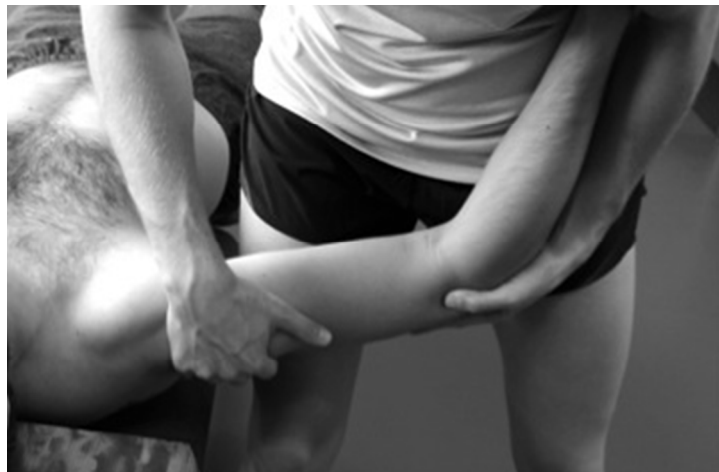

Table 1, Figure 4

30x19mm (300 x 300 DPI)

er review only

1  
2  
3  
4  
5  
6  
7  
8  
9  
10  
11  
12  
13  
14  
15  
16  
17  
18  
19  
20  
21  
22  
23  
24  
25  
26  
27  
28  
29  
30  
31  
32  
33  
34  
35  
36  
37  
38  
39  
40  
41  
42  
43  
44  
45  
46  
47  
48  
49  
50  
51  
52  
53  
54  
55  
56  
57  
58  
59  
60

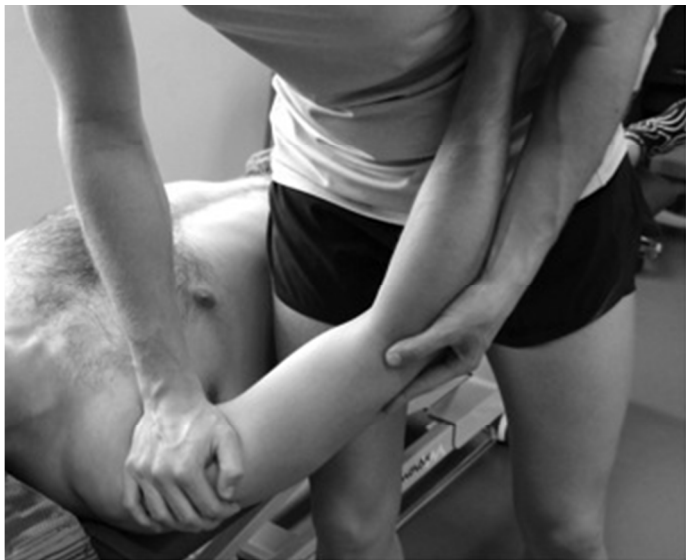

Table 1, Figure 5

28x23mm (300 x 300 DPI)

review only

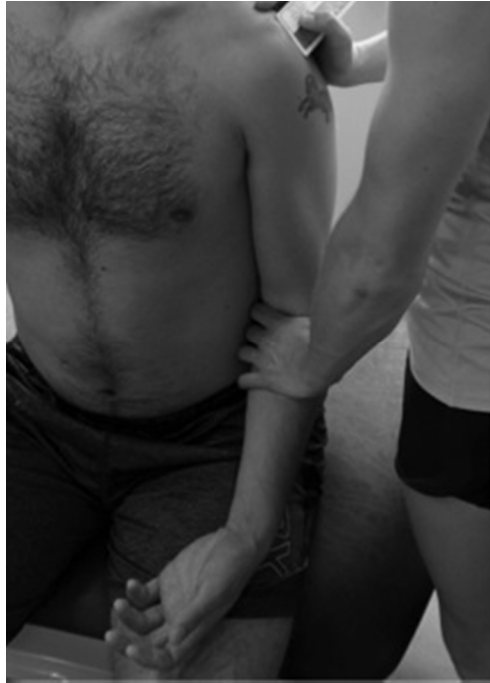

Table 1, Figure 6

20x28mm (300 x 300 DPI)

view only

1  
2  
3  
4  
5  
6  
7  
8  
9  
10  
11  
12  
13  
14  
15  
16  
17  
18  
19  
20  
21  
22  
23  
24  
25  
26  
27  
28  
29  
30  
31  
32  
33  
34  
35  
36  
37  
38  
39  
40  
41  
42  
43  
44  
45  
46  
47  
48  
49  
50  
51  
52  
53  
54  
55  
56  
57  
58  
59  
60

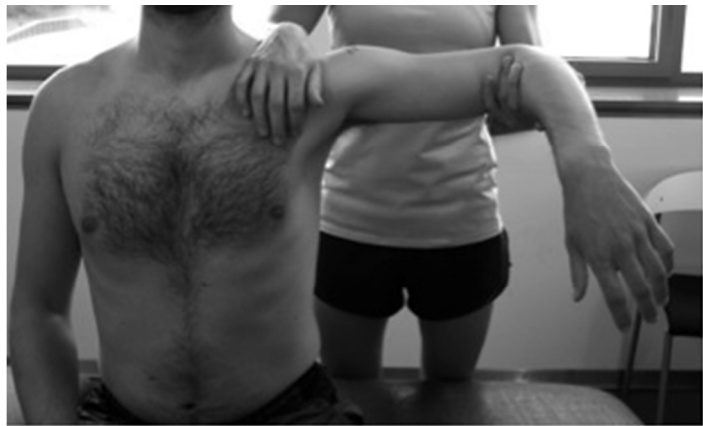

Table 1, Figure 7

29x17mm (300 x 300 DPI)

For peer review only
